# Supplementary material for: Traditional Chinese Medicine Syndrome Patterns and Their Association with Hepatitis B Surface Antigen Levels during the Natural History of Chronic Hepatitis B Virus Infection
Source: Evid Based Complement Alternat Med. 2018 Oct 2;2018:7482593. doi: 10.1155/2018/7482593 (PMC6189657; doi:10.1155/2018/7482593)
Supplement: Supplementary Materials — In order to investigate traditional Chinese medicine syndrome (TCMS) patterns and their association with hepatitis B surface antigen (HBsAg) levels during the natural history of chronic hepatitis B virus infection (CHB), patients were categorized according to the disease phase or stage of CHB, as follows: immune tolerance (ITP); immune clearance (ICP); low or nonreplication (LRP); reactivation (RAP); hepatic cirrhosis (HC); and primary liver cancer (PLC). The patients' TCMS patterns were classified among the following types: spleen-kidney deficiency (SKD); liver-qi depression (LQD); damp-heat in liver-gallbladder (LGDH); liver-kidney deficiency (LKD); and blood stasis blocking collateral (BSBC). HBsAg levels and other serological indicators were quantified for all patients. All clinic data were recorded in the supplementary materials. [file 7482593.f1.xlsx]

## Sheet: 2011
date	name	gender	age	alt	ast	dna	HBeAg	hbsag	NH	NH(IT=1,IC=2,LR=3,RA=4,LC=5,HCC=6)	铁	锌	镁	铜
2011-01-28	蔡燕玲	女	38	12	19	5710	0.116	1974	LR	3
2011-01-20	巢国余	男	67	20	27	2180	0.094	4988	HCC	6	8.4	13.5	0.77	14.75
2011-01-19	陈浩海	男	46	28	25	784	0.132	123	LR	3
2011-02-18	陈建谊	女	39			840	0.113	6355	LR	3
2011-02-15	陈良辉	男	50			0	0.116	2085	LR	3	32.1	12.1	0.94	14.37
2011-01-05	陈明	男	21	46	26	82600000	1066	273.7	IT	1
2011-01-07	陈劲光	男	44	20	29	0	0.134	1078	HCC	6	36.1	13.6	0.84	15.79
	陈汝深	男	34	29	30	0	0.122	3.08	LR	3
2011-02-26	陈世增	男	25	1148	560	4060000	242.9	4454	IC	2	38.1	14.8	0.93	16.92
2011-02-15	陈文全	男	59			708000	307.5	2890			32.5	14.2	0.83	20.83
2011-01-22	何家安	男	33	42	47	959	0.355	4748	HCC	6	20.4	13.8	0.76	11.76
2011-03-01	何苑东	男	36			993	0.798	7629	HCC	6
2011-01-05	黄贵银	女	45	17	27	0	0.11	8440	HCC	6
2011-02-23	黄华禧	男	70	20	27	346000	441.3	5745	HCC	6
2011-01-11	姬棉英	女	48	115	103	59400	201	323.8	IC	2	18.8	13.3	0.94	14.35
2011-01-28	李耀坚	男	53	58	64	362000	348.5	3808	IC	2
2011-02-24	李业祥	男	65	31	44	54300	265.5	952.1	HCC	6	19.3	8.7	0.88	20.03
2011-02-24	梁远英	男	61	103	64	243000	0.115	7053	HCC	6
2011-02-10	林东溪	男	34	26	20	641	7.06	3028	LR	3
2011-02-11	刘新	男	33	17	25	0	0.109	6284	LR	3
2011-01-17	潘锦明	男	73	21	27	0	0.113	6440	HCC	6	19.7	12.1	0.91	14.04
2011-01-14	邱佳庆	男	30	17	22	0	0.143	2737	LR	3
2011-02-26	邱立来	男	36	93	70	0	649.9	5726	LC	5
2011-01-06	宋澈	男	40	40	34	187000	0.096	3633	RA	4
2011-01-19	吴炯枝	男	43	39	57	162	2.21	7476	LC	5	28.3	6.5	0.77	13.64
2011-02-15	吴权辉	男	38	92	200	82500000	969.2	1348	IC	2
2011-01-13	吴旭良	男	57	38	32	1180	0.096	6239	LR	3
2011-01-05	叶小仲	男	48	486	301	452	0.086	56.94	RA	4
2011-01-19	叶卓锋	男	27	55	40	24800000	603.4	3568	IT	1
41657	虞日通	男	39	18	32	3630	0.102	6314	LR	3	21.9	13.9	0.81	9.89
41663	郑海树	男	47	56	76	431000	0.136	6767	HCC	6
41657	朱陆妹	女	57	38	45	9790	0.104	471.2	LR	3
41685	邹彩霞	女	35	17	19	0	0.124	5659	LR	3
41706	陈杏光	男	45	24	32	0	0.131	31.12	HCC	6
41729	陈泽宏	男	54	75	94	21100	0.125	291.4	HCC	6	38.6	21.1	0.68	18.49
41709	戴东祥	男	62	66	336		188.1	6756	LC	5	19.8	7.2	0.81	11.51
41703	戴明新	男	26	610	277	481000	0.105	6787	RA	4	30.1	7.9	0.9	7.93
41723	邓晓军	男	47	115	46	5210	0.193	9113	RA	4	27.5	21.4	0.85	11.52
41729	董华炼	男	22	38	34	35000000	1030	2522	IT	1
41712	冯燕禧	女	28	21	24	272	0.277	7771	LR	3
41728	高兴约	男	53			3970000	0.12	8290	LC	5
41719	郭图丰	男	57	102	80	153000		7275	RA	4	25.4	9.5	0.78	9.07
41702	何日强	男	66	31	51	972	0.122	6228	HCC	6	22.7	11.4	0.83	10.51
41728	洪瑞光	男	40			8050	0.12	4464
41708	黄贵银	女	45	41	44	2800	0.119	8392	HCC	6	13.3	13.5	0.87	12.42
41726	黄亚海	男	68	118	225	735000	0.109	7044	HCC	6	5.8	16.6	0.79	21.88
41709	姬棉	女	59	36	51	822000	0.108	6475	LC	5	23.9	7.2	0.82	14.17
41723	江敏颖	女	34	191	87	3260000	733.3	3794	IC	2
41706	蒋秀华	女	33			4250000	829.9	3830
41726	梁铭君	女	34	15	19	0	23.68	6815	LR	3
41723	廖发盆	男	29	77	30	12800	0.102	522	RA	4	33.6	17	0.66	13.45
41724	廖俊筠	女	58	22	32	0	0.19	1062	LR	3	17.2	22.4	0.89	8.11
41726	刘永彩	男	37	609	357		0.108	7912			22.1	10.4	0.7	9.2
41701	罗金城	男	23	1022	349	30000000	329.5	834.3	IC	2	25.9	21.9	0.79	30.38
41714	骆瑞丰	男	45	27	31	1050	0.446	2635	HCC	6	14.6	13.8	0.91	9.43
41714	骆瑞铭	男	48	34	36	1190	3.68	7543	LR	3	34.4	21.5	0.83	9.04
41708	谭向桃	男	37	15	38	0	0.109	4163	HCC	6	22.9	12.5	0.79	12.21
41720	汤敬东	女	59	36	80	2780000	0.137	7244	LC	5	37.4	17.7	0.69	19.3
41726	涂传捷	男	40	225	514	14800	0.893	8099	HCC	6	12.6	16.6	0.82	27.19
41713	王家祥	男	17	53	45	0	0.21	4528	LR	3
41701	吴承贤	男	54	59	74	0	0.079	6721	LC	5	35.1	12.3	0.85	13.75
41702	吴承哲	男	44	22	17	109	0.127	6713	LR	3	21.7	18.4	0.89	11.08
41715	吴克礼	男	54	41	65	968000	0.126	4133	HCC	6	24.5	7.2	0.76	11.87
41705	吴雄华	男	33	71	41	9200000	0.127	7230	RA	4
41727	杨丽卿	女		47	140	3720	0.124	7936	HCC	6	19.3	12.7	0.74	19.94
41715	叶志恒	男	57	39	34	28800	6.32	7327	HCC	6	36.7	10	0.71	10.46
41722	张新来	男	44	168	344	40800	0.379	8670	HCC	6	13.7	17.4	0.81	22.4
41705	郑海树	男	48	18	34	330	0.112	6316	HCC	6	23	11.2	0.86	9.87
41756	巢国余	男	67	23	31	2610	0.103	6014	HCC	6	7	18.9	0.84	11.09
41756	陈嘉男	男	29			0	1.06	6740	LR	3
41748	陈键荣	男	25	36	26	0	0.256	7148	LR	3	14.2	14.3	0.88	11.74
41750	陈宇高	男	36	28	26	0	0.33	9314	LR	3	19.5	20.9	0.84	19.13
41757	董光洪	男	52	31	20	0	0.119	7800	LR	3
41743	范永江	男	44	80	63	269000	178.9	1456	IC	2	24.6	11.2	0.79	8.6
41737	房志锋	男	44	78	116	507000	0.067	7389	HCC	6	28.4	8.4	0.79	19.88
41747	冯耀明	男	32	49	31	130000000	384.7	1260	IT	1
41744	伏生富	男	47	41	40	70000	2.44	7133	RA	4	20.9	17	0.86	18.37
41755	古水招	男	69	18	20	0	0.298	3779	HCC	6	18.1	16	0.78	21
41736	何小红	男	48	33	25	1090	0.138	6279	LC	5	27.7	17.5	0.89	10.37
41755	何亚桥	男	39	43	45	87700	70.6	7945	IT	1
41750	黄远勇	男	34	74	78	971000	5.85	8503	RA	4	34.8	14.5	0.76	17.07
41742	黄华禧	男	70	40	30	1720	95.03	6754	HCC	6
41754	黄明	男	41	44	34		0.174	6495
41731	李宝彬	男	32	24	25	0		2076	LR	3
41740	李桥营	男	57	44	39	2290000	0.094	6624	RA	4	22.1	20.8	0.93	16.45
41754	李学林	男	61	57	48	5090	0.147	6181	HCC	6	33	12.1	0.74	11.14
41742	李奕戊	男	38	22	17	0	0.12	3680	LR	3
41747	梁帝庆	男	47	58	49	1230	0.117	2392	LR	3
41750	梁伟明	男	38	25	27	0	0.114	7196	LR	3
41751	梁燕玲	女	25			9490000	798.8	4437	IT	1
41741	梁远英	女	61	67	45	246000	0.109	6849	HCC	6	20.8	24.6	0.74	21.33
41736	林荣盛	男	32	238	73	172000000	1134	827.9	IC	2	28.6	18.8	0.94	14.06
41756	林伟新	男	41	34	30	2170000	14.8	8628
41745	刘宇婷	女	17	14	26	2440	0.128	3925	LR	3
41758	罗北成	男	58	18	16	0	0.171	45.39	LR	3
41750	罗何仔	男	55	97	299	645000	0.331	8910	HCC	6
41748	罗杰常	男	26			0	0.132	280	LR	3
41754	马天仁	男	35	39	52	1590000	0.16	3778	LR	3
41754	欧致远	男	28	19	24	0	0.16	4384	LR	3
41737	潘庆光	男	52	46	112	99600	298.9	4417	HCC	6	24.4	10.7	0.79	19.22
41741	邱彩霞	女	32	14	20	0	0.264	7199	LR	3	30.2	18.3	0.91	19.36
41748	谭悦	男	24	23	33	1310	1.23	10445	LC	5	17.8	18.2	0.87	12.08
41755	王国业	男	53	63	58	1750	0.17	3348	LC	5	35.1	15.7	0.74	8.52
41750	王浩东	男	43	34	63	34800	7.11	8285	LC	5	11.1	10.8	0.77	16.79
41749	王运鹏	男	45	28	36	0	5.22	8773	HCC	6	11.3	12.4	0.78	12.61
41754	吴明军	男	31	23	27	0	2.88	8091
41748	吴先泉	男	39	41	17	0	0.111	5041	LR	3	27.9	18.7	0.86	22.45
41731	熊朝良	男	44	319	593	19700000	135.9	6665	IC	2	26.5	18.7	0.82	22.77
41751	熊涌湖	男	24	127	70	929000	0.158	7420	RA	4
41736	要志诚	男	39	53	32	6200000	84.73	1537	IC	2
41748	叶天球	男	60	71	58	0	1.16	3743	LC	5
41757	余沛江	男	28	30	18	0	0.128	8321	LR	3
41750	袁建光	男	42	36	28	0	0.298	8715	LR	3
41743	张乙妹	女	46	21	30	0	0.506	8332	LR	3	35.5	13	0.79	11.68
41754	张志方	男	36	35	26	0	0.176	8571	LR	3	22.3	23.2	0.86	12.15
41755	郑楚	男	32	62	33	2780000	665.3	1240	IC	2
41743	钟崇胜	男	42	17	34	0	0.116	6973	LR	3
41763	陈文彬	男	27			83900000	1260	1614	IT	1
41783	陈泽宏	男	54	100	120	108000	0.104	378.6	HCC	6	37.6	2.9	0.85	19.2
	邓锦萍	女	35	50	39	8420	0.14	7104	RA	4
	邓强	男	39	80	51	427000	0.128	8428	RA	4	24.7	10.8	0.91	9.37
	黄贤青	男	29	68	47	19300000	1098	1112	IT	1
	方东山	男	42	39	50	0	0.109	8146	LC	5	19	9.9	0.7	12.51
	郭素兰	女	28	10	21	11300	0.099	6682	RA	4
	郝日暖	男	31	28	25	1390	0.125	6910	LR	3
	何日强	男	66	30	62	1110	0.091	7472	HCC	6
	黄碧华	女	21	97	57	222000	0.219	3892	RA	4
	黄贵银	女	45	71	65	5860	0.111	10529	HCC	6	24.6	12.7	0.89	8.17
	黄宏力	男	53	21	37	0	0.123	5122	LR	3
	姜赵林	女	27			0	1.73	7196	LR	3
	蒋玉情	男	28	18	24	0	0.116	9222	LR	3
	赖培芳	男	72	65	54	29000	0.113	3234	HCC	6	22.6	18	0.89	22.36
	梁海	男	43	26	35	0	0.112	9126	HCC	6	24.2	13.6	0.84	20.05
	梁达男	男	59	177	105	2700000	0.102	7958	RA	4	30.3	21.4	0.84	17.26
	梁惠金	女	46	28	45	46400	4.33	7528	RA	4
	林浩岗	男	20	13	25	0	0.124	7759	LR	3
	林萌芽	女	55	27	321	0	1.52	8474	HCC	6	17.7	13.4	0.92	26.98
红色查b超	刘楚洪	男	50	54	34	38500	0.105	7446	RA	4
	刘亚富	男	46	57	46	487000	38.29	8081	IC	2	18.5	10.9	0.86	12.08
	罗伟权	男	42	23	25	0	0.109	9714	LR	3	28.6	14.1	0.86	17.81
	骆聪	男	27	266	76	13800000	731.5	4539	IC	2
	麦春蕊	女	29	34	28	71400000	1093	860	IT	1
	麦幸生	男	56	55	48	0	0.106	4386	HCC	6	15.7	13.4	0.91	20.09
	邱怀勇	男	42	24	26	1640	0.63	8093	LR	3	26.8	6.6	0.86	15.81
	邱立来	男	37	82	64	26200	482.2	5118	LC	5
	区健文	男	43	43	28	406000	0.092	6116			35.5	22.7	0.83	6.38
	施祖成	男	26	15	21	0	0.0109	6948	LR	3
	王美语	女	32	25	176	10200	0.116	6812	HCC	6	11.2	12.2	0.77	25.66
	温书云	男	56	44	42	452000	0.122	4992
	吴欢浓	男	46	25	23	157000	7.48	8456
	徐行祥	男	40	32	29	4390	0.114	8752
	徐艳荷	女	51	13	17	0	0.102	248.6
	杨健文	男	48	194	105	19000	0.152	7478			14.2	11.7	0.83	12.73
	叶卓锋	男	27	53	36	6540000	865.2	4765	IT	1
	张凤兰	女	36	36	26	271000	32.18	5852
	张国柱	男	29	223	136	0	0.141	9192	HCC	6	17.8	18.5	0.86	27.29
	张炯壮	男	42	50	37	47800	0.119	9162
	张君友	男	34	179	106	32200000	772	515.2	IC	2
	张巧平	男	31	30	21	1570000	1101	2272	IT	1	18.7	16.8	0.91	19.11
	张祥富	男	41	33	37	4890000	1.08	9547			31.5	16.3	0.78	12.19
6.2-7.1
41818	陈加红	男	36	69	54	3690000	119.9	8596	IC	2	33.1	18.3	0.81	12.85
	陈晓锋	男	27	63	40	445000	140.1	8078	IT	1
	崔合献	男	57	25	85	104000	0.748	4382	LC	5
	邓光裕	男	33	304	124	408000		6646	RA	4
	冯劲耘	男	57	31	40	0	0.134	103
	冯连姬	女	27	54	36	99600	0.152	6700	RA	4
	冯正罗	男	39	22	35	93800	0.423	7910	RA	4	20.7	14.9	0.82	7.11
	黄建山	男	31	14	31	0	0.114	1242	LR	3	27.9	11.4	0.89	19.46
	黄远勇	男	34	33	74	0	1.79	8676	HCC	6	23.6	5	0.78	18.06
	蒋秀华	女	33	24	27	7620000	998.5	4603	IT	1
	李财高	男	41	107	83	88900	0.517	3928	RA	4
	李晓华	男	59	24	30	891000	0.116	8182
	李灼兴	男	30	35	33	0	1.02	7906	LR	3	27.3	15	0.81	8.21
	李榕莲	女	28	257	142	64000000	22.59	2565	IC	2
	梁海	男	43	31	35	0	0.108	9608	HCC	6	30.7	17.2	0.8	12.08
	梁柱宏	男	48	28	51	113000	0.102	5638	LC	5	26	14.6	0.78	12.17
	林飞	男	46	26	27	505000	0.114	963.9	RA	4
	林丽妆	女	42	37	31	4290	0.117	4517	LR	3	16.3	19.5	0.86	22.99
	林荣添	男	61	21	27	0	0.114	7706	LC	5
	刘巨兰	男	36	1580	622	73700000	2.34	1905			30.4	20.5	0.88	17.47
	卢桂玲	女	63	11	22	0		5531
	卢和标	男	52	34	23	3160	0.135	7853			21.9	16.5	0.89	12.3
	莫少平	男	45	28	44	0	0.196	3259
	王笑珍	女	18	67	49	3590000	1298	2008	IC	1
	吴承哲	男	45	35	32	0		6498	LR	3
	吴立清	男	36	17	28	0	0.187	7862
	吴美兰	女	42	17	19	0		9311
	吴其和	男	36	120	138	1430000	781.9	6950	LC	5	23.5	16.7	0.82	20.23
	吴其娣	女	34	33	38	0	0.117	8412	LR	3
	吴权辉	男	39	19	22	0	13.32	8295	LR	3
	吴雄华	男	33	63	41	15600000	0.134	8143	RA	4
	许坤远	男	32	60	42	0	0.115	8236	LR	3
	严杰	男	45	41	33	9620	3.95	7772	RA	4
	叶小仲	男	48	24	29	6060	0.104	662.2	RA	4
	袁棣方	男	68	42	152	0	0.139	106	HCC	6	5.9	16.3	0.81	22.73
	曾淼彦	男	19	10	21	9660	4.56	8621	LR	3
	张盛满	男	48	46	36	14300	0.672	4822
	张小军	男	37	39	43	0	0.125	7611			19.4	6.7	0.79	8.78
	张钊文	男	24	57	22	864000	974.7	6800
	钟结洪	男	39	25	42	2150	0.267	9050			21.2	14.6	0.8	10.78
	庄兴全	男	39	43	29	50600000	653	2011			16	14.9	0.88	18.42
	邹彩霞	女	35			0

## Sheet: 2012
date	name	gender	age	alt	ast	dna	HBeAg	hbsag	NH	铁	锌	镁	铜
41804	袁云天	男	34	27	25	0	0.154	7946	LR

## Sheet: 整理待统计的资料
date	name	gender	age	alt	ast	dna	HBeAg	hbsag	NH	NH(IT=1,IC=2,LR=3,RA=4,LC=5,HCC=6)	铁	锌	镁	铜
2011-01-28	蔡燕玲	女	38	12	19	5710	0.116	1974	LR	3
2011-01-20	巢国余	男	67	20	27	2180	0.094	4988	HCC	6	8.4	13.5	0.77	14.75
2011-01-19	陈浩海	男	46	28	25	784	0.132	123	LR	3
2011-02-18	陈建谊	女	39			840	0.113	6355	LR	3
2011-02-15	陈良辉	男	50			0	0.116	2085	LR	3	32.1	12.1	0.94	14.37
2011-01-05	陈明	男	21	46	26	82600000	1066	273.7	IT	1
2011-01-07	陈劲光	男	44	20	29	0	0.134	1078	HCC	6	36.1	13.6	0.84	15.79
	陈汝深	男	34	29	30	0	0.122	3.08	LR	3
2011-02-26	陈世增	男	25	1148	560	4060000	242.9	4454	IC	2	38.1	14.8	0.93	16.92
2011-02-15	陈文全	男	59			708000	307.5	2890			32.5	14.2	0.83	20.83
2011-01-22	何家安	男	33	42	47	959	0.355	4748	HCC	6	20.4	13.8	0.76	11.76
2011-03-01	何苑东	男	36			993	0.798	7629	HCC	6
2011-01-05	黄贵银	女	45	17	27	0	0.11	8440	HCC	6
2011-02-23	黄华禧	男	70	20	27	346000	441.3	5745	HCC	6
2011-01-11	姬棉英	女	48	115	103	59400	201	323.8	IC	2	18.8	13.3	0.94	14.35
2011-01-28	李耀坚	男	53	58	64	362000	348.5	3808	IC	2
2011-02-24	李业祥	男	65	31	44	54300	265.5	952.1	HCC	6	19.3	8.7	0.88	20.03
2011-02-24	梁远英	男	61	103	64	243000	0.115	7053	HCC	6
2011-02-10	林东溪	男	34	26	20	641	7.06	3028	LR	3
2011-02-11	刘新	男	33	17	25	0	0.109	6284	LR	3
2011-01-17	潘锦明	男	73	21	27	0	0.113	6440	HCC	6	19.7	12.1	0.91	14.04
2011-01-14	邱佳庆	男	30	17	22	0	0.143	2737	LR	3
2011-02-26	邱立来	男	36	93	70	0	649.9	5726	LC	5
2011-01-06	宋澈	男	40	40	34	187000	0.096	3633	RA	4
2011-01-19	吴炯枝	男	43	39	57	162	2.21	7476	LC	5	28.3	6.5	0.77	13.64
2011-02-15	吴权辉	男	38	92	200	82500000	969.2	1348	IC	2
2011-01-13	吴旭良	男	57	38	32	1180	0.096	6239	LR	3
2011-01-05	叶小仲	男	48	486	301	452	0.086	56.94	RA	4
2011-01-19	叶卓锋	男	27	55	40	24800000	603.4	3568	IT	1
41657	虞日通	男	39	18	32	3630	0.102	6314	LR	3	21.9	13.9	0.81	9.89
41663	郑海树	男	47	56	76	431000	0.136	6767	HCC	6
41657	朱陆妹	女	57	38	45	9790	0.104	471.2	LR	3
41685	邹彩霞	女	35	17	19	0	0.124	5659	LR	3
41706	陈杏光	男	45	24	32	0	0.131	31.12	HCC	6
41729	陈泽宏	男	54	75	94	21100	0.125	291.4	HCC	6	38.6	21.1	0.68	18.49
41709	戴东祥	男	62	66	336		188.1	6756	LC	5	19.8	7.2	0.81	11.51
41703	戴明新	男	26	610	277	481000	0.105	6787	RA	4	30.1	7.9	0.9	7.93
41723	邓晓军	男	47	115	46	5210	0.193	9113	RA	4	27.5	21.4	0.85	11.52
41729	董华炼	男	22	38	34	35000000	1030	2522	IT	1
41712	冯燕禧	女	28	21	24	272	0.277	7771	LR	3
41728	高兴约	男	53			3970000	0.12	8290	LC	5
41719	郭图丰	男	57	102	80	153000		7275	RA	4	25.4	9.5	0.78	9.07
41702	何日强	男	66	31	51	972	0.122	6228	HCC	6	22.7	11.4	0.83	10.51
41728	洪瑞光	男	40			8050	0.12	4464
41708	黄贵银	女	45	41	44	2800	0.119	8392	HCC	6	13.3	13.5	0.87	12.42
41726	黄亚海	男	68	118	225	735000	0.109	7044	HCC	6	5.8	16.6	0.79	21.88
41709	姬棉	女	59	36	51	822000	0.108	6475	LC	5	23.9	7.2	0.82	14.17
41723	江敏颖	女	34	191	87	3260000	733.3	3794	IC	2
41706	蒋秀华	女	33			4250000	829.9	3830
41726	梁铭君	女	34	15	19	0	23.68	6815	LR	3
41723	廖发盆	男	29	77	30	12800	0.102	522	RA	4	33.6	17	0.66	13.45
41724	廖俊筠	女	58	22	32	0	0.19	1062	LR	3	17.2	22.4	0.89	8.11
41726	刘永彩	男	37	609	357		0.108	7912			22.1	10.4	0.7	9.2
41701	罗金城	男	23	1022	349	30000000	329.5	834.3	IC	2	25.9	21.9	0.79	30.38
41714	骆瑞丰	男	45	27	31	1050	0.446	2635	HCC	6	14.6	13.8	0.91	9.43
41714	骆瑞铭	男	48	34	36	1190	3.68	7543	LR	3	34.4	21.5	0.83	9.04
41708	谭向桃	男	37	15	38	0	0.109	4163	HCC	6	22.9	12.5	0.79	12.21
41720	汤敬东	女	59	36	80	2780000	0.137	7244	LC	5	37.4	17.7	0.69	19.3
41726	涂传捷	男	40	225	514	14800	0.893	8099	HCC	6	12.6	16.6	0.82	27.19
41713	王家祥	男	17	53	45	0	0.21	4528	LR	3
41701	吴承贤	男	54	59	74	0	0.079	6721	LC	5	35.1	12.3	0.85	13.75
41702	吴承哲	男	44	22	17	109	0.127	6713	LR	3	21.7	18.4	0.89	11.08
41715	吴克礼	男	54	41	65	968000	0.126	4133	HCC	6	24.5	7.2	0.76	11.87
41705	吴雄华	男	33	71	41	9200000	0.127	7230	RA	4
41727	杨丽卿	女		47	140	3720	0.124	7936	HCC	6	19.3	12.7	0.74	19.94
41715	叶志恒	男	57	39	34	28800	6.32	7327	HCC	6	36.7	10	0.71	10.46
41722	张新来	男	44	168	344	40800	0.379	8670	HCC	6	13.7	17.4	0.81	22.4
41705	郑海树	男	48	18	34	330	0.112	6316	HCC	6	23	11.2	0.86	9.87
41756	巢国余	男	67	23	31	2610	0.103	6014	HCC	6	7	18.9	0.84	11.09
41756	陈嘉男	男	29			0	1.06	6740	LR	3
41748	陈键荣	男	25	36	26	0	0.256	7148	LR	3	14.2	14.3	0.88	11.74
41750	陈宇高	男	36	28	26	0	0.33	9314	LR	3	19.5	20.9	0.84	19.13
41757	董光洪	男	52	31	20	0	0.119	7800	LR	3
41743	范永江	男	44	80	63	269000	178.9	1456	IC	2	24.6	11.2	0.79	8.6
41737	房志锋	男	44	78	116	507000	0.067	7389	HCC	6	28.4	8.4	0.79	19.88
41747	冯耀明	男	32	49	31	130000000	384.7	1260	IT	1
41744	伏生富	男	47	41	40	70000	2.44	7133	RA	4	20.9	17	0.86	18.37
41755	古水招	男	69	18	20	0	0.298	3779	HCC	6	18.1	16	0.78	21
41736	何小红	男	48	33	25	1090	0.138	6279	LC	5	27.7	17.5	0.89	10.37
41755	何亚桥	男	39	43	45	87700	70.6	7945	IT	1
41750	黄远勇	男	34	74	78	971000	5.85	8503	RA	4	34.8	14.5	0.76	17.07
41742	黄华禧	男	70	40	30	1720	95.03	6754	HCC	6
41754	黄明	男	41	44	34		0.174	6495
41731	李宝彬	男	32	24	25	0		2076	LR	3
41740	李桥营	男	57	44	39	2290000	0.094	6624	RA	4	22.1	20.8	0.93	16.45
41754	李学林	男	61	57	48	5090	0.147	6181	HCC	6	33	12.1	0.74	11.14
41742	李奕戊	男	38	22	17	0	0.12	3680	LR	3
41747	梁帝庆	男	47	58	49	1230	0.117	2392	LR	3
41750	梁伟明	男	38	25	27	0	0.114	7196	LR	3
41751	梁燕玲	女	25			9490000	798.8	4437	IT	1
41741	梁远英	女	61	67	45	246000	0.109	6849	HCC	6	20.8	24.6	0.74	21.33
41736	林荣盛	男	32	238	73	172000000	1134	827.9	IC	2	28.6	18.8	0.94	14.06
41756	林伟新	男	41	34	30	2170000	14.8	8628
41745	刘宇婷	女	17	14	26	2440	0.128	3925	LR	3
41758	罗北成	男	58	18	16	0	0.171	45.39	LR	3
41750	罗何仔	男	55	97	299	645000	0.331	8910	HCC	6
41748	罗杰常	男	26			0	0.132	280	LR	3
41754	马天仁	男	35	39	52	1590000	0.16	3778	LR	3
41754	欧致远	男	28	19	24	0	0.16	4384	LR	3
41737	潘庆光	男	52	46	112	99600	298.9	4417	HCC	6	24.4	10.7	0.79	19.22
41741	邱彩霞	女	32	14	20	0	0.264	7199	LR	3	30.2	18.3	0.91	19.36
41748	谭悦	男	24	23	33	1310	1.23	10445	LC	5	17.8	18.2	0.87	12.08
41755	王国业	男	53	63	58	1750	0.17	3348	LC	5	35.1	15.7	0.74	8.52
41750	王浩东	男	43	34	63	34800	7.11	8285	LC	5	11.1	10.8	0.77	16.79
41749	王运鹏	男	45	28	36	0	5.22	8773	HCC	6	11.3	12.4	0.78	12.61
41754	吴明军	男	31	23	27	0	2.88	8091
41748	吴先泉	男	39	41	17	0	0.111	5041	LR	3	27.9	18.7	0.86	22.45
41731	熊朝良	男	44	319	593	19700000	135.9	6665	IC	2	26.5	18.7	0.82	22.77
41751	熊涌湖	男	24	127	70	929000	0.158	7420	RA	4
41736	要志诚	男	39	53	32	6200000	84.73	1537	IC	2
41748	叶天球	男	60	71	58	0	1.16	3743	LC	5
41757	余沛江	男	28	30	18	0	0.128	8321	LR	3
41750	袁建光	男	42	36	28	0	0.298	8715	LR	3
41743	张乙妹	女	46	21	30	0	0.506	8332	LR	3	35.5	13	0.79	11.68
41754	张志方	男	36	35	26	0	0.176	8571	LR	3	22.3	23.2	0.86	12.15
41755	郑楚	男	32	62	33	2780000	665.3	1240	IC	2
41743	钟崇胜	男	42	17	34	0	0.116	6973	LR	3
41763	陈文彬	男	27			83900000	1260	1614	IT	1
41783	陈泽宏	男	54	100	120	108000	0.104	378.6	HCC	6	37.6	2.9	0.85	19.2
	邓锦萍	女	35	50	39	8420	0.14	7104	RA	4
	邓强	男	39	80	51	427000	0.128	8428	RA	4	24.7	10.8	0.91	9.37
	黄贤青	男	29	68	47	19300000	1098	1112	IT	1
	方东山	男	42	39	50	0	0.109	8146	LC	5	19	9.9	0.7	12.51
	郭素兰	女	28	10	21	11300	0.099	6682	RA	4
	郝日暖	男	31	28	25	1390	0.125	6910	LR	3
	何日强	男	66	30	62	1110	0.091	7472	HCC	6
	黄碧华	女	21	97	57	222000	0.219	3892	RA	4
	黄贵银	女	45	71	65	5860	0.111	10529	HCC	6	24.6	12.7	0.89	8.17
	黄宏力	男	53	21	37	0	0.123	5122	LR	3
	姜赵林	女	27			0	1.73	7196	LR	3
	蒋玉情	男	28	18	24	0	0.116	9222	LR	3
	赖培芳	男	72	65	54	29000	0.113	3234	HCC	6	22.6	18	0.89	22.36
	梁海	男	43	26	35	0	0.112	9126	HCC	6	24.2	13.6	0.84	20.05
	梁达男	男	59	177	105	2700000	0.102	7958	RA	4	30.3	21.4	0.84	17.26
	梁惠金	女	46	28	45	46400	4.33	7528	RA	4
	林浩岗	男	20	13	25	0	0.124	7759	LR	3
	林萌芽	女	55	27	321	0	1.52	8474	HCC	6	17.7	13.4	0.92	26.98
红色查b超	刘楚洪	男	50	54	34	38500	0.105	7446	RA	4
	刘亚富	男	46	57	46	487000	38.29	8081	IC	2	18.5	10.9	0.86	12.08
	罗伟权	男	42	23	25	0	0.109	9714	LR	3	28.6	14.1	0.86	17.81
	骆聪	男	27	266	76	13800000	731.5	4539	IC	2
	麦春蕊	女	29	34	28	71400000	1093	860	IT	1
	麦幸生	男	56	55	48	0	0.106	4386	HCC	6	15.7	13.4	0.91	20.09
	邱怀勇	男	42	24	26	1640	0.63	8093	LR	3	26.8	6.6	0.86	15.81
	邱立来	男	37	82	64	26200	482.2	5118	LC	5
	区健文	男	43	43	28	406000	0.092	6116			35.5	22.7	0.83	6.38
	施祖成	男	26	15	21	0	0.0109	6948	LR	3
	王美语	女	32	25	176	10200	0.116	6812	HCC	6	11.2	12.2	0.77	25.66
	温书云	男	56	44	42	452000	0.122	4992
	吴欢浓	男	46	25	23	157000	7.48	8456
	徐行祥	男	40	32	29	4390	0.114	8752
	徐艳荷	女	51	13	17	0	0.102	248.6
	杨健文	男	48	194	105	19000	0.152	7478			14.2	11.7	0.83	12.73
	叶卓锋	男	27	53	36	6540000	865.2	4765	IT	1
	张凤兰	女	36	36	26	271000	32.18	5852
	张国柱	男	29	223	136	0	0.141	9192	HCC	6	17.8	18.5	0.86	27.29
	张炯壮	男	42	50	37	47800	0.119	9162
	张君友	男	34	179	106	32200000	772	515.2	IC	2
	张巧平	男	31	30	21	1570000	1101	2272	IT	1	18.7	16.8	0.91	19.11
	张祥富	男	41	33	37	4890000	1.08	9547			31.5	16.3	0.78	12.19
6.2-7.1
41818	陈加红	男	36	69	54	3690000	119.9	8596	IC	2	33.1	18.3	0.81	12.85
	陈晓锋	男	27	63	40	445000	140.1	8078	IT	1
	崔合献	男	57	25	85	104000	0.748	4382	LC	5
	邓光裕	男	33	304	124	408000		6646	RA	4
	冯劲耘	男	57	31	40	0	0.134	103
	冯连姬	女	27	54	36	99600	0.152	6700	RA	4
	冯正罗	男	39	22	35	93800	0.423	7910	RA	4	20.7	14.9	0.82	7.11
	黄建山	男	31	14	31	0	0.114	1242	LR	3	27.9	11.4	0.89	19.46
	黄远勇	男	34	33	74	0	1.79	8676	HCC	6	23.6	5	0.78	18.06
	蒋秀华	女	33	24	27	7620000	998.5	4603	IT	1
	李财高	男	41	107	83	88900	0.517	3928	RA	4
	李晓华	男	59	24	30	891000	0.116	8182
	李灼兴	男	30	35	33	0	1.02	7906	LR	3	27.3	15	0.81	8.21
	李榕莲	女	28	257	142	64000000	22.59	2565	IC	2
	梁海	男	43	31	35	0	0.108	9608	HCC	6	30.7	17.2	0.8	12.08
	梁柱宏	男	48	28	51	113000	0.102	5638	LC	5	26	14.6	0.78	12.17
	林飞	男	46	26	27	505000	0.114	963.9	RA	4
	林丽妆	女	42	37	31	4290	0.117	4517	LR	3	16.3	19.5	0.86	22.99
	林荣添	男	61	21	27	0	0.114	7706	LC	5
	刘巨兰	男	36	1580	622	73700000	2.34	1905			30.4	20.5	0.88	17.47
	卢桂玲	女	63	11	22	0		5531
	卢和标	男	52	34	23	3160	0.135	7853			21.9	16.5	0.89	12.3
	莫少平	男	45	28	44	0	0.196	3259
	王笑珍	女	18	67	49	3590000	1298	2008	IC	1
	吴承哲	男	45	35	32	0		6498	LR	3
	吴立清	男	36	17	28	0	0.187	7862
	吴美兰	女	42	17	19	0		9311
	吴其和	男	36	120	138	1430000	781.9	6950	LC	5	23.5	16.7	0.82	20.23
	吴其娣	女	34	33	38	0	0.117	8412	LR	3
	吴权辉	男	39	19	22	0	13.32	8295	LR	3
	吴雄华	男	33	63	41	15600000	0.134	8143	RA	4
	许坤远	男	32	60	42	0	0.115	8236	LR	3
	严杰	男	45	41	33	9620	3.95	7772	RA	4
	叶小仲	男	48	24	29	6060	0.104	662.2	RA	4
	袁棣方	男	68	42	152	0	0.139	106	HCC	6	5.9	16.3	0.81	22.73
	曾淼彦	男	19	10	21	9660	4.56	8621	LR	3
	张盛满	男	48	46	36	14300	0.672	4822
	张小军	男	37	39	43	0	0.125	7611			19.4	6.7	0.79	8.78
	张钊文	男	24	57	22	864000	974.7	6800
	钟结洪	男	39	25	42	2150	0.267	9050			21.2	14.6	0.8	10.78
	庄兴全	男	39	43	29	50600000	653	2011			16	14.9	0.88	18.42
	邹彩霞	女	35			0
41074	袁云天	男	34	27	25	0	0.154	7946	LR
	杜志勇	男	25	63	39	211000000	1215.84	30456.5	IT
		男	26	54	37	173000000	1270.28	29339.3	IT
		男	25	35	21	41900000	1349.47	35154.2	IT
		男	26	53	33	407000000	1128.34	77214.4	IT
		男	26	55	38	148000000	1395.15	33395.6	IT
	李细妹	女	25	45	31	189000000	1445.95	40134.4	IT
		女	26	25	25	213000000	1195.16	36478.5	IT
		女	25	39	32	393000000	1205.45	33987.4	IT
		女	26	28	20	104000000	1158.4	51412	IT
		女	26	39	30	209000000	1260.18	48201	IT
	张雄球	男	39	38	20	95300000	1126	27798.1	IT
		男	39	42	27	93700000	973.91	24285.7	IT
		男	39	46	28	174000000	955.95	25909.3	IT
		男	39	44	24	135000000	1134.29	31226.3	IT
		男	40	106	43	134000000	1051.09	34520.1	IC
		男	40	68	28	718000000	1046.42	34766.3	IT
	杨碧斯	女	42	20	20	31900000	1492.15	12989.2	IT
		女	42	28	21	72600000	1531.75	15059.5	IT
		女	42	26	26	69000000	1243.84	8946.6	IT
		女	42	25	24	49100000	1220.7	14278.1	IT
		女	43	21	18	78100000	1434.79	10983.4	IT
		女	43	34	28	58800000	1620.23	15068.9	IT
	朱春万	男	38	43	36	5690000	319.76	4447.73	IC	G2
		男	38	56	42	33600000	494.07	4283.77	IC
		男	38	411	285	121000000	1386.62	7684.54	IC
		男	38	39	36	2420000	55.79	3845.91	IC
		男	39	65	48	3680000	50.68	3811.48	IC
		男	39	40	36	33600000	195.9	6326.34	IC
	陈素敏	女	28	79	49	220000000	1406.2	99443.4	IT
		女	28	78	53	743000000	1219.97	102390	IT
		女	28	76	61	1300000000	1082.86	71155.9	IT
		女	28	121	90	374000000	844.73	49426.6	IC
		女	29	264	219	121000000	683.9	23553	IC
	谷尾明	男	26	80	36	32100000	1425.03	13252.2	IC
		男	26	60	29	62900000	1248.34	12542	IT
		男	26	45	25	31400000	1124.36	16040.9	IT
		男	26	39	25	28400000	1128.82	13722.9	IT
		男	27	52	24	79100000	1263.84	14631.9	IT
	杨艳金	男	24	20	18	272000000	1324.84	59239.4	IT
		男	24	17	21	205000000	1117.56	52138.3	IT
		男	24	33	23	199000000	1045.27	75631.4	IT
		男	25	18	23	257000000	1162.48	57341.2	IT
		男	25	20	21	270000000	1307.03	83561.4	IT
	戴一晨	男	26	117	51	153000000	516.99	4956.01	IC
		男	26	40	28	26100000	783.25	4233.22	IC
		男	26	28	30	40500000	828.12	9956.25	IT
		男	27	33	20	77500000	840.43	10306.2	IT
		男	27	60	33	85700000	1029.33	16165.6	IT
	李苑华	女	31	36	25	195000000	1424.14	34513.3	IT
		女	31	39	27	135000000	1302.06	45515.1	IT
		女	32	51	30	241000000	1509.12	31188.8	IT
		女	32	59	31	183000000	1797.33	36644.2	IT
	林晓欣	女	27	25	23	12800000	536.16	11138.8	IT
		女	27	33	28	11100000	835.42	12311.9	IT
		女	27	38	29	15300000	805.61	12359.1	IT
		女	28	38	31	23900000	915.85	13251.5	IT
	谢小丽	女	26	26	18	231000000	1153.95	65090.5	IT
		女	26	23	21	172000000	1075.06	91362.8	IT
	刘春香	女	37	26	24	265000000	1360.44	87954.4	IT
		女	37	23	22	411000000	1221.51	105446	IT
	刘丽平	女	29	33	30	32500000	1137.11	11462.3	IT
	俞雷根	男	26	35	27	164000000	1634.56	13748.3	IT
	颜兴	男	35	98	82	11600000	216.54	1488.47	IC
		男	35	103	72	13600000	440.68	1237.2	IC
		男	36	101	66	5030000	251.06	1391.13	IC
	李文涛	男	26	63	34	3810000	766.75	159.79	IC
		男	26	264	125	25200000	934.31	2325.04	IC
		男	27	51	30	314000	353.55	3005.18	IC
		男	27	25	26	407000	487.95	121.78	IC
	李明	男	41	94	38	227000000	1527.25	47872.4	IC
		男	41	81	39	160000000	1382.52	77731.6	IC
		男	42	77	38	115000000	1664.47	74165.7	IT
	蒋柳	女	25	20	22	25500000	1450.05	43710.5	IT
		女	25	17	25	71200000	1294.89	73634.9	IT
		女	26	26	21	63700000	1517.99	57503.4	IT
		女	26	20	48	62000000	1635.32	89888.6	IT
	钱享	男	30	365	323	1280000	55.93	1631.86	IC
		男	30	231	198	30600	8.43	2366.14	IC
		男	31	323	238	95300	8.94	3196.18	IC
		男	31	578	356	6870000	398.91	3415.26	IC
		男	31	431	330	876000	14.49	2558.58	IC
	冼为民	男	60	52	30	667000000	1134.94	42012.3	IT
		男	60	49	29	113000000	899.26	30919.2	IT
		男	61	45	27	451000000	1323.14	70135.3	IT
		男	61	54	31	352000000	1375.74	86325.3	IT

## Sheet: IT和IC
姓名	gender	age	ALT	AST	HBV DNA	HBV-DNA log10	HBeAg	HBeAg log10	HBsAg	HBsAg log10	Phases
蔡燕玲	女	38	12	19	5710		0.116		1974		LR
巢国余	男	67	20	27	2180		0.094		4988		HCC
陈浩海	男	46	28	25	784		0.132		123		LR
陈建谊	女	39	32	21	840		0.113		6355		LR
陈良辉	男	50	18	16	100		0.116		2085		LR
陈明	男	21	46	26	82600000		1066		70135.3		IT
陈劲光	男	44	20	29	100		0.134		1078		HCC
陈汝深	男	34	29	30	100		0.122		3.08		LR
陈世增	男	25	1148	560	4060000		242.9		4454		IC
陈文全	男	59	215	137	708000		307.5		2890		IC
何家安	男	33	42	47	959		0.355		4748		HCC
何苑东	男	36	65	29	993		0.798		7629		HCC
黄贵银	女	45	17	27	100		0.11		8440		HCC
黄华禧	男	70	20	27	346000		441.3		5745		HCC
姬棉英	女	48	115	103	59400		201		323.8		IC
李耀坚	男	53	58	64	362000		348.5		3808		IC
李业祥	男	65	31	44	54300		265.5		952.1		HCC
梁远英	男	61	103	64	243000		0.115		7053		HCC
林东溪	男	34	26	20	641		7.06		3028		LR
刘新	男	33	17	25	100		0.109		6284		LR
潘锦明	男	73	21	27	100		0.113		6440		HCC
邱佳庆	男	30	17	22	100		0.143		2737		LR
邱立来	男	36	93	70	100		649.9		5726		LC
宋澈	男	40	40	34	187000		0.096		3633		RA
吴炯枝	男	43	39	57	162		2.21		7476		LC
吴权辉	男	38	92	200	82500000		969.2		1348		IC
吴旭良	男	57	38	32	1180		0.096		6239		LR
叶小仲	男	48	486	301	25200		0.086		1156.94		RA
叶卓锋	男	27	55	40	24800000		603.4		3568		IT
虞日通	男	39	18	32	3630		0.102		6314		LR
郑海树	男	47	56	76	431000		0.136		6767		HCC
朱陆妹	女	57	38	45	9790		0.104		471.2		LR
邹彩霞	女	35	17	19	100		0.124		5659		LR
陈杏光	男	45	24	32	100		0.131		31.12		HCC
陈泽宏	男	54	75	94	21100		0.125		291.4		HCC
戴东祥	男	62	66	336	3230		188.1		6756		LC
戴明新	男	26	610	277	481000		0.105		6787		RA
邓晓军	男	47	115	46	5210		0.193		9113		RA
董华炼	男	22	38	34	35000000		1030		25220		IT
冯燕禧	女	28	21	24	272		0.277		7771		LR
高兴约	男	53	32	28	3970000		0.12		8290		LC
郭图丰	男	57	102	80	153000		0.293		7275		RA
何日强	男	66	31	51	972		0.122		6228		HCC
洪瑞光	男	40	21	17	8050		0.12		4464		LR
黄贵银	女	45	41	44	2800		0.119		8392		HCC
黄亚海	男	68	118	225	735000		0.109		7044		HCC
姬棉	女	59	36	51	822000		0.108		6475		LC
江敏颖	女	34	191	87	3260000		733.3		3794		IC
蒋秀华	女	33	86	65	4250000		829.9		3830		IC
梁铭君	女	34	15	19	100		23.68		6815		LR
廖发盆	男	29	77	30	12800		0.102		522		RA
廖俊筠	女	58	22	32	100		0.19		1062		LR
刘永彩	男	37	609	357	846000		0.108		7912		RA
罗金城	男	23	1022	349	30000000		329.5		834.3		IC
骆瑞丰	男	45	27	31	1050		0.446		2635		HCC
骆瑞铭	男	48	34	36	1190		3.68		7543		LR
谭向桃	男	37	15	38	100		0.109		4163		HCC
汤敬东	女	59	36	80	2780000		0.137		7244		LC
涂传捷	男	40	225	514	14800		0.893		8099		HCC
王家祥	男	17	53	45	100		0.21		4528		LR
吴承贤	男	54	59	74	100		0.079		6721		LC
吴承哲	男	44	22	17	109		0.127		6713		LR
吴克礼	男	54	41	65	968000		0.126		4133		HCC
吴雄华	男	33	71	41	9200000		0.127		7230		RA
杨丽卿	女	56	47	140	3720		0.124		7936		HCC
叶志恒	男	57	39	34	28800		6.32		7327		HCC
张新来	男	44	168	344	40800		0.379		8670		HCC
郑海树	男	48	18	34	330		0.112		6316		HCC
巢国余	男	67	23	31	2610		0.103		6014		HCC
陈嘉男	男	29	23	19	100		1.06		6740		LR
陈键荣	男	25	36	26	100		0.256		7148		LR
陈宇高	男	36	28	26	100		0.33		9314		LR
董光洪	男	52	31	20	100		0.119		7800		LR
范永江	男	44	80	63	269000		178.9		1456		IC
房志锋	男	44	78	116	507000		0.067		7389		HCC
冯耀明	男	32	49	31	130000000		384.7		12600		IT
伏生富	男	47	41	40	70000		2.44		7133		RA
古水招	男	69	18	20	100		0.298		3779		HCC
何小红	男	48	33	25	1090		0.138		6279		LC
何亚桥	男	39	43	45	87700		70.6		7945		IC
黄远勇	男	34	74	78	971000		5.85		8503		RA
黄华禧	男	70	40	30	1720		95.03		6754		HCC
黄明	男	41	44	34	2340		0.174		6495		LR
李宝彬	男	32	24	25	100		0.162		2076		LR
李桥营	男	57	44	39	2290000		0.094		6624		RA
李学林	男	61	57	48	5090		0.147		6181		HCC
李奕戊	男	38	22	17	100		0.12		3680		LR
梁帝庆	男	47	58	49	1230		0.117		2392		LR
梁伟明	男	38	25	27	100		0.114		7196		LR
梁燕玲	女	25	26	23	9490000		798.8		44370		IT
梁远英	女	61	67	45	246000		0.109		6849		HCC
林荣盛	男	32	238	73	172000000		1134		8270.9		IC
林伟新	男	41	34	30	2170000		14.8		8628		RA
刘宇婷	女	17	14	26	2440		0.128		3925		LR
罗北成	男	58	18	16	100		0.171		45.39		LR
罗何仔	男	55	97	299	645000		0.331		8910		HCC
罗杰常	男	26	26	15	100		0.132		280		LR
马天仁	男	35	39	52	1590000		0.16		3778		RA
欧致远	男	28	19	24	100		0.16		4384		LR
潘庆光	男	52	46	112	99600		298.9		4417		HCC
邱彩霞	女	32	14	20	100		0.264		7199		LR
谭悦	男	24	23	33	1310		1.23		10445		LC
王国业	男	53	63	58	1750		0.17		3348		LC
王浩东	男	43	34	63	34800		7.11		8285		LC
王运鹏	男	45	28	36	100		5.22		8773		HCC
吴明军	男	31	23	27	100		2.88		8091		LR
吴先泉	男	39	41	17	100		0.111		5041		LR
熊朝良	男	44	319	593	19700000		135.9		6665		IC
熊涌湖	男	24	127	70	929000		0.158		7420		RA
要志诚	男	39	53	32	6200000		84.73		1537		IC
叶天球	男	60	71	58	100		1.16		3743		LC
余沛江	男	28	30	18	100		0.128		8321		LR
袁建光	男	42	36	28	100		0.298		8715		LR
张乙妹	女	46	21	30	100		0.506		8332		LR
张志方	男	36	35	26	100		0.176		8571		LR
郑楚	男	32	62	33	2780000		665.3		12400		IC
钟崇胜	男	42	17	34	100		0.116		6973		LR
陈文彬	男	27	21	16	83900000		1260		16140		IT
陈泽宏	男	54	100	120	108000		0.104		378.6		HCC
邓锦萍	女	35	50	39	20420		0.14		7104		RA
邓强	男	39	80	51	427000		0.128		8428		RA
黄贤青	男	29	68	47	19300000		1098		11120		IT
方东山	男	42	39	50	100		0.109		8146		LC
郭素兰	女	28	10	21	11300		0.099		6682		LR
郝日暖	男	31	28	25	1390		0.125		6910		LR
何日强	男	66	30	62	1110		0.091		7472		HCC
黄碧华	女	21	97	57	222000		0.219		3892		RA
黄贵银	女	45	71	65	5860		0.111		10529		HCC
黄宏力	男	53	21	37	100		0.123		5122		LR
姜赵林	女	27	29	23	100		1.73		7196		LR
蒋玉情	男	28	18	24	100		0.116		9222		LR
赖培芳	男	72	65	54	29000		0.113		3234		HCC
梁海	男	43	26	35	100		0.112		9126		HCC
梁达男	男	59	177	105	2700000		0.102		7958		RA
梁惠金	女	46	68	45	46400		4.33		7528		RA
林浩岗	男	20	13	25	100		0.124		7759		LR
林萌芽	女	55	27	321	100		1.52		8474		HCC
刘楚洪	男	50	54	34	38500		0.105		7446		RA
刘亚富	男	46	57	46	487000		38.29		8081		IC
罗伟权	男	42	23	25	100		0.109		9714		LR
骆聪	男	27	266	76	13800000		731.5		4539		IC
麦春蕊	女	29	34	28	71400000		1093		86000		IT
麦幸生	男	56	55	48	100		0.106		4386		HCC
邱怀勇	男	42	24	26	1640		0.63		8093		LR
邱立来	男	37	82	64	26200		482.2		5118		LC
区健文	男	43	73	58	406000		0.092		6116		RA
施祖成	男	26	15	21	100		0.0109		6948		LR
王美语	女	32	25	176	10200		0.116		6812		HCC
温书云	男	56	44	42	452000		0.122		4992		RA
吴欢浓	男	46	55	53	157000		7.48		8456		RA
徐行祥	男	40	32	29	4390		0.114		8752		LR
徐艳荷	女	51	13	17	100		0.102		248.6		LR
杨健文	男	48	194	105	19000		0.152		7478		RA
叶卓锋	男	27	153	136	6540000		865.2		4765		IC
张凤兰	女	36	81	54	271000		32.18		5852		IC
张国柱	男	29	223	136	100		0.141		9192		HCC
张炯壮	男	42	50	37	47800		0.119		9162		RA
张君友	男	34	179	106	32200000		772		515.2		IC
张巧平	男	31	30	21	1570000		1101		2272		IT
张祥富	男	41	56	37	4890000		1.08		9547		RA
陈加红	男	36	69	54	3690000		119.9		8596		IC
陈晓锋	男	27	63	40	445000		140.1		8078		IT
崔合献	男	57	25	85	104000		0.748		4382		LC
邓光裕	男	33	304	124	408000		0.335		6646		RA
冯劲耘	男	57	31	40	100		0.134		103		LR
冯连姬	女	27	54	36	99600		0.152		6700		RA
冯正罗	男	39	122	85	93800		0.423		7910		RA
黄建山	男	31	14	31	100		0.114		1242		LR
黄远勇	男	34	33	74	100		1.79		8676		HCC
蒋秀华	女	33	24	27	7620000		998.5		4603		IT
李财高	男	41	107	83	88900		0.517		3928		RA
李晓华	男	59	24	30	891000		0.116		8182		HCC
李灼兴	男	30	35	33	100		1.02		7906		LR
李榕莲	女	28	257	142	64000000		22.59		2565		IC
梁海	男	43	31	35	100		0.108		9608		HCC
梁柱宏	男	48	28	51	113000		0.102		5638		LC
林飞	男	46	80	67	505000		0.114		963.9		RA
林丽妆	女	42	37	31	4290		0.117		4517		LR
林荣添	男	61	21	27	100		0.114		7706		LC
刘巨兰	男	36	1580	622	73700000		2.34		6905		RA
卢桂玲	女	63	11	22	100		0.112		5531		LR
卢和标	男	52	34	23	3160		0.135		7853		LR
莫少平	男	45	28	44	100		0.196		3259		LR
王笑珍	女	18	67	49	3590000		1298		20080		IC
吴承哲	男	45	35	32	100		0.192		6498		LR
吴立清	男	36	17	28	100		0.187		7862		LR
吴美兰	女	42	17	19	100		0.129		9311		LR
吴其和	男	36	120	138	1430000		781.9		6950		LC
吴其娣	女	34	33	38	100		0.117		8412		LR
吴权辉	男	39	19	22	100		13.32		8295		LR
吴雄华	男	33	63	41	15600000		0.134		8143		RA
许坤远	男	32	60	42	100		0.115		8236		LR
严杰	男	45	41	33	9620		3.95		7772		LR
叶小仲	男	48	24	29	6060		0.104		662.2		LR
袁棣方	男	68	42	152	100		0.139		106		HCC
曾淼彦	男	19	10	21	9660		4.56		8621		LR
张盛满	男	48	46	36	14300		0.672		4822		LR
张小军	男	37	39	43	100		0.125		7611		LR
张钊文	男	24	57	22	864000		974.7		6800		RA
钟结洪	男	39	25	42	2150		0.267		9050		LR
庄兴全	男	39	43	29	50600000		653		20110		IC
邹彩霞	女	35	30	19	100		0.153		3212		LR
袁云天	男	34	27	25	100		0.154		7946		LR
杜志勇	男	25	63	39	211000000	8.32428	1215.84	3.08488	30456.5	4.48368	IT
	男	26	54	37	173000000	8.23805	1270.28	3.1039	29339.3	4.46745	IT
	男	25	35	21	41900000	7.62221	1349.47	3.13016	35154.2	4.54598	IT
	男	26	53	33	407000000	8.60959	1128.34	3.05244	77214.4	4.8877	IT
	男	26	55	38	148000000	8.17026	1395.15	3.14462	33395.6	4.52369	IT
李细妹	女	25	45	31	189000000	8.27646	1445.95	3.16015	40134.4	4.60352	IT
	女	26	25	25	213000000	8.32838	1195.16	3.07743	36478.5	4.56204	IT
	女	25	39	32	393000000	8.59439	1205.45	3.08115	33987.4	4.53132	IT
	女	26	28	20	104000000	8.01703	1158.4	3.06386	51412	4.71106	IT
	女	26	39	30	209000000	8.32015	1260.18	3.10043	48201	4.68306	IT
张雄球	男	39	38	20	95300000	7.97909	1126	3.05154	27798.1	4.44402	IT
	男	39	42	27	93700000	7.97174	973.91	2.98852	24285.7	4.38535	IT
	男	39	46	28	174000000	8.24055	955.95	2.98044	25909.3	4.41346	IT
	男	39	44	24	135000000	8.13033	1134.29	3.05472	31226.3	4.49452	IT
	男	40	106	43	134000000	8.1271	1051.09	3.02164	34520.1	4.53807	IC
	男	40	68	28	718000000	8.85612	1046.42	3.01971	34766.3	4.54116	IT
杨碧斯	女	42	20	20	31900000	7.50379	1492.15	3.17381	12989.2	4.11358	IT
	女	42	28	21	72600000	7.86094	1531.75	3.18519	15059.5	4.17781	IT
	女	42	26	26	69000000	7.83885	1243.84	3.09476	8946.6	3.95166	IT
	女	42	25	24	49100000	7.69108	1220.7	3.08661	14278.1	4.15467	IT
	女	43	21	18	78100000	7.89265	1434.79	3.15679	10983.4	4.04074	IT
	女	43	34	28	58800000	7.76938	1620.23	3.20958	15068.9	4.17808	IT
朱春万	男	38	43	36	5690000	6.75511	319.76	2.50482	4447.73	3.64814	IC
	男	38	56	42	33600000	7.52634	494.07	2.69379	4283.77	3.63183	IC
	男	38	411	285	121000000	8.08279	1386.62	3.14196	7684.54	3.88562	IC
	男	38	39	36	2420000	6.38382	55.79	1.74656	3845.91	3.585	IC
	男	39	65	48	3680000	6.56585	50.68	1.70484	3811.48	3.58109	IC
	男	39	40	36	33600000	7.52634	195.9	2.29203	6326.34	3.80115	IC
陈素敏	女	28	79	49	220000000	8.34242	1406.2	3.14805	99443.4	4.99758	IT
	女	28	78	53	743000000	8.87099	1219.97	3.08635	102390	5.01026	IT
	女	28	76	61	1300000000	9.11394	1082.86	3.03457	71155.9	4.85221	IT
	女	28	121	90	374000000	8.57287	844.73	2.92672	49426.6	4.69396	IC
	女	29	264	219	121000000	8.08279	683.9	2.83499	23553	4.37205	IC
谷尾明	男	26	80	36	32100000	7.50651	1425.03	3.15382	13252.2	4.12229	IC
	男	26	60	29	62900000	7.79865	1248.34	3.09633	12542	4.09837	IT
	男	26	45	25	31400000	7.49693	1124.36	3.05091	16040.9	4.20523	IT
	男	26	39	25	28400000	7.45332	1128.82	3.05262	13722.9	4.13745	IT
	男	27	52	24	79100000	7.89818	1263.84	3.10169	14631.9	4.1653	IT
杨艳金	男	24	20	18	272000000	8.43457	1324.84	3.12216	59239.4	4.77261	IT
	男	24	17	21	205000000	8.31175	1117.56	3.04827	52138.3	4.71716	IT
	男	24	33	23	199000000	8.29885	1045.27	3.01923	75631.4	4.8787	IT
	男	25	18	23	257000000	8.40993	1162.48	3.06539	57341.2	4.75847	IT
	男	25	20	21	270000000	8.43136	1307.03	3.11629	83561.4	4.92201	IT
戴一晨	男	26	117	51	153000000	8.18469	516.99	2.71348	4956.01	3.69513	IC
	男	26	40	28	26100000	7.41664	783.25	2.8939	4233.22	3.62667	IC
	男	26	28	30	40500000	7.60746	828.12	2.91809	9956.25	3.9981	IT
	男	27	33	20	77500000	7.8893	840.43	2.9245	10306.2	4.0131	IT
	男	27	60	33	85700000	7.93298	1029.33	3.01255	16165.6	4.20859	IT
李苑华	女	31	36	25	195000000	8.29003	1424.14	3.15355	34513.3	4.53799	IT
	女	31	39	27	135000000	8.13033	1302.06	3.11463	45515.1	4.65816	IT
	女	32	51	30	241000000	8.38202	1509.12	3.17872	31188.8	4.494	IT
	女	32	59	31	183000000	8.26245	1797.33	3.25463	36644.2	4.56401	IT
林晓欣	女	27	25	23	12800000	7.10721	536.16	2.72929	11138.8	4.04684	IT
	女	27	33	28	11100000	7.04532	835.42	2.9219	12311.9	4.09033	IT
	女	27	38	29	15300000	7.18469	805.61	2.90612	12359.1	4.09199	IT
	女	28	38	31	23900000	7.3784	915.85	2.96182	13251.5	4.12226	IT
谢小丽	女	26	26	18	231000000	8.36361	1153.95	3.06219	65090.5	4.81352	IT
	女	26	23	21	172000000	8.23553	1075.06	3.03143	91362.8	4.96077	IT
刘春香	女	37	26	24	265000000	8.42325	1360.44	3.13368	87954.4	4.94426	IT
	女	37	23	22	411000000	8.61384	1221.51	3.0869	105446	5.02303	IT
刘丽平	女	29	33	30	32500000	7.51188	1137.11	3.0558	11462.3	4.05927	IT
俞雷根	男	26	35	27	164000000	8.21484	1634.56	3.2134	13748.3	4.13825	IT
颜兴	男	35	98	82	11600000	7.06446	216.54	2.33554	1488.47	3.17274	IC
	男	35	103	72	13600000	7.13354	440.68	2.64412	1237.2	3.09244	IC
	男	36	101	66	5030000	6.70157	251.06	2.39978	1391.13	3.14337	IC
李文涛	男	26	63	34	3810000	6.58092	766.75	2.88465	159.79	2.20355	IC
	男	26	264	125	25200000	7.4014	934.31	2.97049	2325.04	3.36643	IC
	男	27	51	30	314000	5.49693	353.55	2.54845	3005.18	3.47787	IC
	男	27	25	26	407000	5.60959	487.95	2.68838	121.78	2.08558	IC
李明	男	41	94	38	227000000	8.35603	1527.25	3.18391	47872.4	4.68009	IC
	男	41	81	39	160000000	8.20412	1382.52	3.14067	77731.6	4.8906	IC
	男	42	77	38	115000000	8.0607	1664.47	3.22128	74165.7	4.8702	IT
蒋柳	女	25	20	22	25500000	7.40654	1450.05	3.16138	43710.5	4.64059	IT
	女	25	17	25	71200000	7.85248	1294.89	3.11223	73634.9	4.86708	IT
	女	26	26	21	63700000	7.80414	1517.99	3.18127	57503.4	4.75969	IT
	女	26	20	48	62000000	7.79239	1635.32	3.2136	89888.6	4.9537	IT
钱享	男	30	365	323	1280000	6.10721	55.93	1.74764	1631.86	3.21268	IC
	男	30	231	198	30600	4.48572	8.43	0.925828	2366.14	3.37404	IC
	男	31	323	238	95300	4.97909	8.94	0.951338	3196.18	3.50463	IC
	男	31	578	356	6870000	6.83696	398.91	2.60087	3415.26	3.53342	IC
	男	31	431	330	876000	5.9425	14.49	1.16107	2558.58	3.408	IC
冼为民	男	60	52	30	667000000	8.82413	1134.94	3.05497	42012.3	4.62338	IT
	男	60	49	29	113000000	8.05308	899.26	2.95389	30919.2	4.49023	IT
	男	61	45	27	451000000	8.65418	1323.14	3.12161	70135.3	4.84594	IT
	男	61	54	31	352000000	8.54654	1375.74	3.13854	86325.3	4.93614	IT

## Sheet: ITP
gender	age	ALT	AST	HBV DNA	HBV DNA log10 IU/mL	HBeAg	HBeAg log10 IU/mL	HBsAg原始	HBsAg1	HBsAg	HBsAg log10 IU/mL	HBsAg log10 IU/mL1	Phases	Phases in the course of CHB	CMS of patients with CHB (1=SKD,2=LQD,3=IDHR,4=LKD,5=BSBC)
男	25	63	39	211000000	8.32428	1215.84	3.08488	30456.5	30456.5	30456.5	4.48368	4.48368	IT	1	1
男	26	54	37	173000000	8.23805	1270.28	3.1039	29339.3	29339.3	29339.3	4.46745	4.46745	IT	1	1
男	25	35	21	41900000	7.62221	1349.47	3.13016	35154.2	35154.2	35154.2	4.54598	4.54598	IT	1	1
男	26	53	33	407000000	8.60959	1128.34	3.05244	77214.4	77214.4	77214.4	4.8877	4.8877	IT	1	1
男	26	55	38	148000000	8.17026	1395.15	3.14462	33395.6	33395.6	33395.6	4.52369	4.52369	IT	1	1
女	25	45	31	189000000	8.27646	1445.95	3.16015	40134.4	40134.4	40134.4	4.60352	4.60352	IT	1	1
女	26	25	25	213000000	8.32838	1195.16	3.07743	36478.5	36478.5	36478.5	4.56204	4.56204	IT	1	1
女	25	39	32	393000000	8.59439	1205.45	3.08115	33987.4	33987.4	33987.4	4.53132	4.53132	IT	1	1
女	26	28	20	104000000	8.01703	1158.4	3.06386	51412	51412	51412	4.71106	4.71106	IT	1	1
女	26	39	30	209000000	8.32015	1260.18	3.10043	48201	48201	48201	4.68306	4.68306	IT	1	1
男	39	38	20	95300000	7.97909	1126	3.05154	27798.1	27798.1	27798.1	4.44402	4.44402	IT	1	3
男	39	42	27	93700000	7.97174	973.91	2.98852	24285.7	24285.7	24285.7	4.38535	4.38535	IT	1	2
男	39	46	28	174000000	8.24055	955.95	2.98044	25909.3	25909.3	25909.3	4.41346	4.41346	IT	1	2
男	39	44	24	135000000	8.13033	1134.29	3.05472	31226.3	31226.3	31226.3	4.49452	4.49452	IT	1	3
男	40	68	28	718000000	8.85612	1046.42	3.01971	34766.3	34766.3	34766.3	4.54116	4.54116	IT	1	4
女	42	20	20	31900000	7.50379	1492.15	3.17381	12989.2	12989.2	12989.2	4.11358	4.11358	IT	1	2
女	42	28	21	72600000	7.86094	1531.75	3.18519	15059.5	15059.5	15059.5	4.17781	4.17781	IT	1	2
女	42	26	26	69000000	7.83885	1243.84	3.09476	8946.6	8946.6	8946.6	3.95166	3.95166	IT	1	2
女	42	25	24	49100000	7.69108	1220.7	3.08661	14278.1	14278.1	14278.1	4.15467	4.15467	IT	1	2
女	43	21	18	78100000	7.89265	1434.79	3.15679	10983.4	10983.4	10983.4	4.04074	4.04074	IT	1	2
女	43	34	28	58800000	7.76938	1620.23	3.20958	15068.9	15068.9	15068.9	4.17808	4.17808	IT	1	1
女	28	79	49	220000000	8.34242	1406.2	3.14805	99443.4	99443.4	99443.4	4.99758	4.99758	IT	1	1
女	28	78	53	743000000	8.87099	1219.97	3.08635	102390	102390	102390	5.01026	5.01026	IT	1	1
女	28	76	61	1300000000	9.11394	1082.86	3.03457	71155.9	71155.9	71155.9	4.85221	4.85221	IT	1	1
男	26	60	29	62900000	7.79865	1248.34	3.09633	12542	12542	12542	4.09837	4.09837	IT	1	2
男	26	45	25	31400000	7.49693	1124.36	3.05091	16040.9	16040.9	16040.9	4.20523	4.20523	IT	1	2
男	26	39	25	28400000	7.45332	1128.82	3.05262	13722.9	13722.9	13722.9	4.13745	4.13745	IT	1	1
男	27	52	24	79100000	7.89818	1263.84	3.10169	14631.9	14631.9	14631.9	4.1653	4.1653	IT	1	1
男	24	20	18	272000000	8.43457	1324.84	3.12216	59239.4	59239.4	59239.4	4.77261	4.77261	IT	1	2
男	24	17	21	205000000	8.31175	1117.56	3.04827	52138.3	52138.3	52138.3	4.71716	4.71716	IT	1	1
男	24	33	23	199000000	8.29885	1045.27	3.01923	75631.4	75631.4	75631.4	4.8787	4.8787	IT	1	2
男	25	18	23	257000000	8.40993	1162.48	3.06539	57341.2	57341.2	57341.2	4.75847	4.75847	IT	1	1
男	25	20	21	270000000	8.43136	1307.03	3.11629	83561.4	83561.4	83561.4	4.92201	4.92201	IT	1	2
男	26	28	30	40500000	7.60746	828.12	2.91809	9956.25	9956.25	9956.25	3.9981	3.9981	IT	1	2
男	27	33	20	77500000	7.8893	840.43	2.9245	10306.2	10306.2	10306.2	4.0131	4.0131	IT	1	1
男	27	60	33	85700000	7.93298	1029.33	3.01255	16165.6	16165.6	16165.6	4.20859	4.20859	IT	1	2
女	31	36	25	195000000	8.29003	1424.14	3.15355	34513.3	34513.3	34513.3	4.53799	4.53799	IT	1	1
女	31	39	27	135000000	8.13033	1302.06	3.11463	45515.1	45515.1	45515.1	4.65816	4.65816	IT	1	1
女	32	51	30	241000000	8.38202	1509.12	3.17872	31188.8	31188.8	31188.8	4.494	4.494	IT	1	1
女	32	59	31	183000000	8.26245	1797.33	3.25463	36644.2	36644.2	36644.2	4.56401	4.56401	IT	1	1
女	27	25	23	12800000	7.10721	536.16	2.72929	11138.8	11138.8	11138.8	4.04684	4.04684	IT	1	2
女	27	33	28	11100000	7.04532	835.42	2.9219	12311.9	12311.9	12311.9	4.09033	4.09033	IT	1	1
女	27	38	29	15300000	7.18469	805.61	2.90612	12359.1	12359.1	12359.1	4.09199	4.09199	IT	1	2
女	28	38	31	23900000	7.3784	915.85	2.96182	13251.5	13251.5	13251.5	4.12226	4.12226	IT	1	1
女	26	26	18	231000000	8.36361	1153.95	3.06219	65090.5	65090.5	65090.5	4.81352	4.81352	IT	1	2
女	26	23	21	172000000	8.23553	1075.06	3.03143	91362.8	91362.8	91362.8	4.96077	4.96077	IT	1	2
女	37	26	24	265000000	8.42325	1360.44	3.13368	87954.4	87954.4	87954.4	4.94426	4.94426	IT	1	1
女	37	23	22	411000000	8.61384	1221.51	3.0869	105446	105446	105446	5.02303	5.02303	IT	1	1
女	29	33	30	32500000	7.51188	1137.11	3.0558	11462.3	11462.3	11462.3	4.05927	4.05927	IT	1	2
男	26	35	27	164000000	8.21484	1634.56	3.2134	13748.3	13748.3	13748.3	4.13825	4.13825	IT	1	1
男	42	77	38	115000000	8.0607	1664.47	3.22128	74165.7	74165.7	74165.7	4.8702	4.8702	IT	1	4
女	25	20	22	25500000	7.40654	1450.05	3.16138	43710.5	43710.5	43710.5	4.64059	4.64059	IT	1	2
女	25	17	25	71200000	7.85248	1294.89	3.11223	73634.9	73634.9	73634.9	4.86708	4.86708	IT	1	2
女	26	26	21	63700000	7.80414	1517.99	3.18127	57503.4	57503.4	57503.4	4.75969	4.75969	IT	1	2
女	26	20	48	62000000	7.79239	1635.32	3.2136	89888.6	89888.6	89888.6	4.9537	4.9537	IT	1	1
男	60	52	30	667000000	8.82413	1134.94	3.05497	42012.3	42012.3	42012.3	4.62338	4.62338	IT	1	1
男	60	49	29	113000000	8.05308	899.26	2.95389	30919.2	30919.2	30919.2	4.49023	4.49023	IT	1	1
男	61	45	27	451000000	8.65418	1323.14	3.12161	70135.3	70135.3	70135.3	4.84594	4.84594	IT	1	1
男	61	54	31	352000000	8.54654	1375.74	3.13854	86325.3	86325.3	86325.3	4.93614	4.93614	IT	1	1
男	21	46	26	82600000	7.91698	1066	3.02776	70135.3	70135.3	70135.3	4.84594	4.84594	IT	1	2
男	27	55	40	24800000	7.39445	603.4	2.78061	3568	3568	3568	3.55242	3.55242	IT	1	4
女	33	24	27	7620000	6.88195	998.5	2.99935	4603	4603	4603	3.66304	3.66304	IT	1	3
男	22	38	34	35000000	7.54407	1030	3.01284	25220	25220	25220	4.40175	4.40175	IT	1	5
男	32	49	31	130000000	8.11394	384.7	2.58512	12600	12600	12600	4.10037	4.10037	IT	1	5
女	25	26	23	9490000	6.97727	798.8	2.90244	44370	44370	44370	4.64709	4.64709	IT	1	4
男	27	21	16	83900000	7.92376	1260	3.10037	16140	16140	16140	4.2079	4.2079	IT	1	3
男	29	68	47	19300000	7.28556	1098	3.0406	11120	11120	11120	4.0461	4.0461	IT	1	3
女	29	34	28	71400000	7.8537	1093	3.03862	86000	86000	86000	4.9345	4.9345	IT	1	3
男	31	30	21	1570000	6.1959	1101	3.04179	2272	22720	22720	4.35641	4.35641	IT	1	3
男	27	63	40	445000	5.64836	140.1	2.14644	8078	8078	8078	3.9073	3.9073	IT	1	4

## Sheet: ICP
gender	age	ALT	AST	HBV DNA	HBV DNA log10 IU/mL	HBeAg	HBeAg log10 IU/mL	HBsAg原始	HBsAg1	HBsAg	HBsAg log10 IU/mL	HBsAg log10 IU/mL1	Phases	Phases in the course of CHB	CMS of patients with CHB (1=SKD,2=LQD,3=IDHR,4=LKD,5=BSBC)
男	25	1148	560	4060000	6.60853	242.9	2.38543	4454	4454	4454	3.64875	3.64875	IC	2	2
男	59	215	137	708000	5.85003	307.5	2.48785	2890	2890	2890	3.4609	3.4609	IC	2	1
女	48	115	103	59400	4.77379	201	2.3032	323.8	323.8	323.8	2.51028	2.51028	IC	2	5
男	53	58	64	362000	5.55871	348.5	2.5422	3808	30808	30808	4.48866	4.48866	IC	2	3
男	38	92	200	82500000	7.91645	969.2	2.98641	1348	1348	1348	3.12969	3.12969	IC	2	4
女	34	191	87	3260000	6.51322	733.3	2.86528	3794	30794	30794	4.48847	4.48847	IC	2	3
女	33	86	65	4250000	6.62839	829.9	2.91903	3830	3830	3830	3.5832	3.5832	IC	2	3
男	23	1022	349	30000000	7.47712	329.5	2.51786	834.3	834.3	834.3	2.92132	2.92132	IC	2	3
男	44	80	63	269000	5.42975	178.9	2.25261	1456	1456	1456	3.16316	3.16316	IC	2	3
男	39	43	45	87700	4.943	70.6	1.8488	7945	7945	7945	3.90009	3.90009	IC	2	3
男	32	238	73	172000000	8.23553	1134	3.05461	8270.9	8270.9	8270.9	3.91755	3.91755	IC	2	4
男	44	319	593	19700000	7.29447	135.9	2.13322	6665	6665	26650	4.4257	3.8238	IC	2	4
男	39	53	32	6200000	6.79239	84.73	1.92804	1537	1537	1537	3.18667	3.18667	IC	2	3
男	32	62	33	2780000	6.44404	665.3	2.82302	12400	12400	32400	4.51055	4.09342	IC	2	3
男	46	57	46	487000	5.68753	38.29	1.58309	8081	8081	8081	3.90747	3.90747	IC	2	3
男	27	266	76	13800000	7.13988	731.5	2.86421	4539	9539	30539	4.48485	3.9795	IC	2	3
男	27	153	136	6540000	6.81558	865.2	2.93712	4765	40765	40765	4.61029	4.61029	IC	2	4
女	36	81	54	271000	5.43297	32.18	1.50759	5852	5852	5852	3.7673	3.7673	IC	2	4
男	34	179	106	32200000	7.50786	772	2.88762	515.2	515.2	515.2	2.71198	2.71198	IC	2	4
男	36	69	54	3690000	6.56703	119.9	2.07882	8596	8596	8596	3.9343	3.9343	IC	2	5
女	28	257	142	64000000	7.80618	22.59	1.35392	2565	2565	20565	4.31313	3.40909	IC	2	3
女	18	67	49	3590000	6.55509	1298	3.11327	20080	20080	20080	4.30276	4.30276	IC	2	3
男	39	43	29	50600000	7.70415	653	2.81491	20110	20110	20110	4.30341	4.30341	IC	2	3
男	40	106	43	134000000	8.1271	1051.09	3.02164	34520.1	34520.1	34520.1	4.53807	4.53807	IC	2	1
男	38	43	36	5690000	6.75511	319.76	2.50482	4447.73	4447.73	4447.73	3.64814	3.64814	IC	2	2
男	38	56	42	33600000	7.52634	494.07	2.69379	4283.77	4283.77	4283.77	3.63183	3.63183	IC	2	3
男	38	411	285	121000000	8.08279	1386.62	3.14196	7684.54	7684.54	30684.5	4.48692	3.88562	IC	2	1
男	38	39	36	2420000	6.38382	55.79	1.74656	3845.91	3845.91	3845.91	3.585	3.585	IC	2	3
男	39	65	48	3680000	6.56585	50.68	1.70484	3811.48	30811.5	30811.5	4.48871	4.48871	IC	2	4
男	39	40	36	33600000	7.52634	195.9	2.29203	6326.34	6326.34	6326.34	3.80115	3.80115	IC	2	4
女	28	121	90	374000000	8.57287	844.73	2.92672	49426.6	49426.6	49426.6	4.69396	4.69396	IC	2	4
女	29	264	219	121000000	8.08279	683.9	2.83499	23553	23553	23553	4.37205	4.37205	IC	2	3
男	26	80	36	32100000	7.50651	1425.03	3.15382	13252.2	13252.2	13252.2	4.12229	4.12229	IC	2	3
男	26	117	51	153000000	8.18469	516.99	2.71348	4956.01	40956	40956	4.61232	4.61232	IC	2	5
男	26	40	28	26100000	7.41664	783.25	2.8939	4233.22	4233.22	14233.2	4.1533	3.62667	IC	2	3
男	35	98	82	11600000	7.06446	216.54	2.33554	1488.47	10488.5	10488.5	4.02071	4.02071	IC	2	3
男	35	103	72	13600000	7.13354	440.68	2.64412	1237.2	1237.2	1237.2	3.09244	3.09244	IC	2	2
男	36	101	66	5030000	6.70157	251.06	2.39978	1391.13	10391.1	10391.1	4.01666	4.01666	IC	2	3
男	26	63	34	3810000	6.58092	766.75	2.88465	159.79	159.79	159.79	2.20355	2.20355	IC	2	3
男	26	264	125	25200000	7.4014	934.31	2.97049	2325.04	20325	20325	4.30803	4.30803	IC	2	2
男	27	51	30	314000	5.49693	353.55	2.54845	3005.18	3005.18	3005.18	3.47787	3.47787	IC	2	2
男	27	52	26	407000	5.60959	487.95	2.68838	121.78	121.78	121.78	2.08558	2.08558	IC	2	3
男	41	94	38	227000000	8.35603	1527.25	3.18391	47872.4	47872.4	47872.4	4.68009	4.68009	IC	2	1
男	41	81	39	160000000	8.20412	1382.52	3.14067	77731.6	77731.6	77731.6	4.8906	4.8906	IC	2	1
男	30	365	323	1280000	6.10721	55.93	1.74764	1631.86	1631.86	1631.86	3.21268	3.21268	IC	2	3
男	30	231	198	30600	4.48572	8.43	0.925828	2366.14	2366.14	12366.1	4.09223	3.37404	IC	2	3
男	31	323	238	95300	4.97909	8.94	0.951338	3196.18	3196.18	3196.18	3.50463	3.50463	IC	2	3
男	31	578	356	6870000	6.83696	398.91	2.60087	3415.26	30415.3	30415.3	4.48309	4.48309	IC	2	3
男	31	431	330	876000	5.9425	14.49	1.16107	2558.58	2558.58	2558.58	3.408	3.408	IC	2	4
男	24	57	22	864000	5.93651	974.7	2.98887	6800	6800	6800	3.83251	3.83251	IC	2	3

## Sheet: RAP
gender	age	ALT	AST	HBV DNA	HBV DNA log10 IU/mL	HBeAg	HBeAg log10 IU/mL	HBsAg原始	HBsAg1	HBsAg	HBsAg log10 IU/mL	HBsAg log10 IU/mL1	Phases	Phases in the course of CHB	CMS of patients with CHB (1=SKD,2=LQD,3=IDHR,4=LKD,5=BSBC)
男	33	63	41	15600000	7.19312	0.134	-0.872895	8143	8143	8143	3.91078	3.91078	RA	4	3
男	36	1580	622	73700000	7.86747	2.34	0.369216	6905	6905	6905	3.83916	3.83916	RA	4	3
男	46	80	67	505000	5.70329	0.114	-0.943095	963.9	963.9	963.9	2.98403	2.98403	RA	4	3
男	41	107	83	88900	4.9489	0.517	-0.286509	3928	3928	3928	3.59417	3.59417	RA	4	3
女	27	54	36	99600	4.99826	0.152	-0.818156	6700	6700	6700	3.82607	3.82607	RA	4	3
男	39	122	85	93800	4.9722	0.423	-0.37366	7910	7910	7910	3.89818	3.89818	RA	4	4
男	33	304	124	408000	5.61066	0.335	-0.474955	6646	6646	6646	3.82256	3.82256	RA	4	3
男	41	56	37	4890000	6.68931	1.08	0.0334238	9547	9547	9547	3.97987	3.97987	RA	4	3
男	42	50	37	47800	4.67943	0.119	-0.924453	9162	9162	9162	3.96199	3.96199	RA	4	5
男	48	194	105	19000	4.27875	0.152	-0.818156	7478	7478	7478	3.87379	3.87379	RA	4	3
男	56	44	42	452000	5.65514	0.122	-0.91364	4992	4992	4992	3.69827	3.69827	RA	4	3
男	46	55	53	157000	5.1959	7.48	0.873902	8456	8456	8456	3.92716	3.92716	RA	4	3
男	43	73	58	406000	5.60853	0.092	-1.03621	6116	6116	6116	3.78647	3.78647	RA	4	4
男	50	54	34	38500	4.58546	0.105	-0.978811	7446	7446	7446	3.87192	3.87192	RA	4	5
男	59	177	105	2700000	6.43136	0.102	-0.9914	7958	7958	7958	3.9008	3.9008	RA	4	3
女	46	68	45	46400	4.66652	4.33	0.636488	7528	7528	7528	3.87668	3.87668	RA	4	3
女	21	97	57	222000	5.34635	0.219	-0.659556	3892	3892	3892	3.59017	3.59017	RA	4	5
女	35	50	39	20420	4.31006	0.14	-0.853872	7104	7104	7104	3.8515	3.8515	RA	4	4
男	39	80	51	427000	5.63043	0.128	-0.89279	8428	8428	8428	3.92572	3.92572	RA	4	4
男	24	127	70	929000	5.96802	0.158	-0.801343	7420	7420	7420	3.8704	3.8704	RA	4	4
男	35	39	52	1590000	6.2014	0.16	-0.79588	3778	3778	3778	3.57726	3.57726	RA	4	4
男	41	34	30	2170000	6.33646	14.8	1.17026	8628	8628	8628	3.93591	3.93591	RA	4	3
男	57	44	39	2290000	6.35984	0.094	-1.02687	6624	6624	6624	3.82112	3.82112	RA	4	4
男	34	74	78	971000	5.98722	5.85	0.767156	8503	8503	8503	3.92957	3.92957	RA	4	4
男	47	41	40	70000	4.8451	2.44	0.38739	7133	7133	7133	3.85327	3.85327	RA	4	3
男	33	71	41	9200000	6.96379	0.127	-0.896196	7230	7230	7230	3.85914	3.85914	RA	4	2
男	37	609	357	846000	5.92737	0.108	-0.966576	7912	7912	7912	3.89829	3.89829	RA	4	2
男	29	77	30	12800	4.10721	0.102	-0.9914	522	522	522	2.71767	2.71767	RA	4	4
男	26	610	277	481000	5.68215	0.105	-0.978811	6787	6787	6787	3.83168	3.83168	RA	4	3
男	47	115	46	5210	3.71684	0.193	-0.714443	9113	9113	9113	3.95966	3.95966	RA	4	3
男	48	486	301	25200	4.4014	0.086	-1.0655	1156.94	1156.94	1156.94	3.06331	3.06331	RA	4	4
男	40	40	34	187000	5.27184	0.096	-1.01773	3633	3633	3633	3.56027	3.56027	RA	4	5
男	57	102	80	153000	5.18469	0.293	-0.533132	7275	7275	7275	3.86183	3.86183	RA	4	1

## Sheet: LRP
gender	age	ALT	AST	HBV DNA	HBV DNA log10 IU/mL	HBeAg	HBeAg log10 IU/mL	HBsAg原始	HBsAg1	HBsAg	HBsAg log10 IU/mL	HBsAg log10 IU/mL1	Phases	Phases in the course of CHB	CMS of patients with CHB (1=SKD,2=LQD,3=IDHR,4=LKD,5=BSBC)
女	38	12	19	5710	3.75664	0.116	-0.935542	1974	1974	1974	3.29535	3.29535	LR	3	4
男	46	28	25	784	2.89432	0.132	-0.879426	123	123	123	2.08991	2.08991	LR	3	4
女	39	32	21	840	2.92428	0.113	-0.946922	6355	6355	6355	3.80312	3.80312	LR	3	5
男	50	18	16	100	2	0.116	-0.935542	2085	2085	2085	3.31911	3.31911	LR	3	4
男	34	29	30	100	2	0.122	-0.91364	3.08	3.08	3.08	0.488551	0.488551	LR	3	4
男	34	26	20	641	2.80686	7.06	0.848805	3028	3028	3028	3.48116	3.48116	LR	3	5
男	33	17	25	100	2	0.109	-0.962574	6284	6284	6284	3.79824	3.79824	LR	3	5
男	30	17	22	100	2	0.143	-0.844664	2737	2737	2737	3.43727	3.43727	LR	3	4
男	57	38	32	1180	3.07188	0.096	-1.01773	6239	6239	6239	3.79511	3.79511	LR	3	3
男	39	18	32	3630	3.55991	0.102	-0.9914	6314	6314	6314	3.8003	3.8003	LR	3	5
女	57	38	45	9790	3.99078	0.104	-0.982967	471.2	471.2	471.2	2.67321	2.67321	LR	3	5
女	35	17	19	100	2	0.124	-0.906578	5659	5659	5659	3.75274	3.75274	LR	3	5
女	28	21	24	272	2.43457	0.277	-0.55752	7771	7771	7771	3.89048	3.89048	LR	3	2
男	40	21	17	8050	3.9058	0.12	-0.920819	4464	4464	4464	3.64972	3.64972	LR	3	2
女	34	15	19	100	2	23.68	1.37438	6815	6815	615	2.78888	3.83347	LR	3	2
女	58	22	32	100	2	0.19	-0.721246	1062	1062	1062	3.02612	3.02612	LR	3	4
男	48	34	36	1190	3.07555	3.68	0.565848	7543	7543	7543	3.87754	3.87754	LR	3	5
男	17	53	45	100	2	0.21	-0.677781	4528	4528	4528	3.65591	3.65591	LR	3	5
男	44	22	17	109	2.03743	0.127	-0.896196	6713	6713	6713	3.82692	3.82692	LR	3	3
男	29	23	19	100	2	1.06	0.0253059	6740	6740	6740	3.82866	3.82866	LR	3	3
男	25	36	26	100	2	0.256	-0.59176	7148	7148	7148	3.85418	3.85418	LR	3	3
男	36	28	26	100	2	0.33	-0.481486	9314	9314	9314	3.96914	3.96914	LR	3	3
男	52	31	20	100	2	0.119	-0.924453	7800	7800	7800	3.89209	3.89209	LR	3	5
男	41	44	34	2340	3.36922	0.174	-0.759451	6495	6495	495	2.69461	3.81258	LR	3	5
男	32	24	25	100	2	0.162	-0.790485	2076	2076	2076	3.31723	3.31723	LR	3	4
男	38	22	17	100	2	0.12	-0.920819	3680	3680	3680	3.56585	3.56585	LR	3	4
男	47	58	49	1230	3.08991	0.117	-0.931814	2392	2392	392	2.59329	3.37876	LR	3	4
男	38	25	27	100	2	0.114	-0.943095	7196	7196	196	2.29226	3.85709	LR	3	3
女	17	14	26	2440	3.38739	0.128	-0.89279	3925	3925	3925	3.59384	3.59384	LR	3	3
男	58	18	16	100	2	0.171	-0.767004	45.39	45.39	45.39	1.65696	1.65696	LR	3	4
男	26	26	15	100	2	0.132	-0.879426	280	280	280	2.44716	2.44716	LR	3	4
男	28	19	24	100	2	0.16	-0.79588	4384	4384	4384	3.64187	3.64187	LR	3	4
女	32	14	20	100	2	0.264	-0.578396	7199	7199	7199	3.85727	3.85727	LR	3	4
男	31	23	27	100	2	2.88	0.459392	8091	876	876	2.9425	2.9425	LR	3	1
男	39	41	17	100	2	0.111	-0.954677	5041	5041	5041	3.70252	3.70252	LR	3	4
男	28	30	18	100	2	0.128	-0.89279	8321	8321	8321	3.92018	3.92018	LR	3	1
男	42	36	28	100	2	0.298	-0.525784	8715	8715	715	2.85431	3.94027	LR	3	1
女	46	21	30	100	2	0.506	-0.295849	8332	812	812	2.90956	2.90956	LR	3	1
男	36	35	26	100	2	0.176	-0.754487	8571	8571	571	2.75664	3.93303	LR	3	1
男	42	17	34	100	2	0.116	-0.935542	6973	6973	6973	3.84342	3.84342	LR	3	2
女	28	10	21	11300	4.05308	0.099	-1.00436	6682	680	680	2.83251	2.83251	LR	3	2
男	31	28	25	1390	3.14301	0.125	-0.90309	6910	6910	910	2.95904	3.83948	LR	3	2
男	53	21	37	100	2	0.123	-0.910095	5122	5122	5122	3.70944	3.70944	LR	3	4
女	27	29	23	100	2	1.73	0.238046	7196	7196	7196	3.85709	3.85709	LR	3	2
男	28	18	24	100	2	0.116	-0.935542	9222	9222	9222	3.96483	3.96483	LR	3	1
男	20	13	25	100	2	0.124	-0.906578	7759	7759	7759	3.88981	3.88981	LR	3	2
男	42	23	25	100	2	0.109	-0.962574	9714	9714	9714	3.9874	3.9874	LR	3	1
男	42	24	26	1640	3.21484	0.63	-0.200659	8093	8093	8093	3.90811	3.90811	LR	3	1
男	26	15	21	100	2	0.0109	-1.96257	6948	6948	6948	3.84186	3.84186	LR	3	2
男	40	32	29	4390	3.64246	0.114	-0.943095	8752	8752	8752	3.94211	3.94211	LR	3	1
女	51	13	17	100	2	0.102	-0.9914	248.6	248.6	248.6	2.3955	2.3955	LR	3	4
男	57	31	40	100	2	0.134	-0.872895	103	103	103	2.01284	2.01284	LR	3	4
男	31	14	31	100	2	0.114	-0.943095	1242	1242	1242	3.09412	3.09412	LR	3	4
男	30	35	33	100	2	1.02	0.00860017	7906	7906	7906	3.89796	3.89796	LR	3	2
女	42	37	31	4290	3.63246	0.117	-0.931814	4517	4517	4517	3.65485	3.65485	LR	3	3
女	63	11	22	100	2	0.112	-0.950782	5531	5531	5531	3.7428	3.7428	LR	3	2
男	52	34	23	3160	3.49969	0.135	-0.869666	7853	7853	7853	3.89504	3.89504	LR	3	2
男	45	28	44	100	2	0.196	-0.707744	3259	3259	3259	3.51308	3.51308	LR	3	4
男	45	35	32	100	2	0.192	-0.716699	6498	6498	6498	3.81278	3.81278	LR	3	2
男	36	17	28	100	2	0.187	-0.728158	7862	7862	7862	3.89553	3.89553	LR	3	2
女	42	17	19	100	2	0.129	-0.88941	9311	9311	9311	3.969	3.969	LR	3	1
女	34	33	38	100	2	0.117	-0.931814	8412	8412	8412	3.9249	3.9249	LR	3	3
男	39	19	22	100	2	13.32	1.1245	8295	8295	8295	3.91882	3.91882	LR	3	3
男	32	60	42	100	2	0.115	-0.939302	8236	8236	8236	3.91572	3.91572	LR	3	3
男	45	41	33	9620	3.98318	3.95	0.596597	7772	7772	7772	3.89053	3.89053	LR	3	5
男	48	24	29	6060	3.78247	0.104	-0.982967	662.2	662.2	662.2	2.82099	2.82099	LR	3	4
男	19	10	21	9660	3.98498	4.56	0.658965	8621	8621	8621	3.93556	3.93556	LR	3	3
男	48	46	36	14300	4.15534	0.672	-0.172631	4822	4822	4822	3.68323	3.68323	LR	3	4
男	37	39	43	100	2	0.125	-0.90309	7611	7611	7611	3.88144	3.88144	LR	3	1
男	39	25	42	2150	3.33244	0.267	-0.573489	9050	950	950	2.97772	2.97772	LR	3	2
女	35	30	19	100	2	0.153	-0.815309	3212	3212	3212	3.50678	3.50678	LR	3	4
男	34	27	25	100	2	0.154	-0.812479	7946	7946	7946	3.90015	3.90015	LR	3	4

## Sheet: HCP
gender	age	ALT	AST	HBV DNA	HBV DNA log10 IU/mL	HBeAg	HBeAg log10 IU/mL	HBsAg原始	HBsAg1	HBsAg	HBsAg log10 IU/mL	HBsAg log10 IU/mL1	Phases	Phases in the course of CHB	CMS of patients with CHB (1=SKD,2=LQD,3=IDHR,4=LKD,5=BSBC)
男	36	120	138	1430000	6.15534	781.9	2.89315	6950	6950	6950	3.84198	3.84198	LC	5	5
男	61	21	27	100	2	0.114	-0.943095	7706	706	706	2.8488	2.8488	LC	5	5
男	48	28	51	113000	5.05308	0.102	-0.9914	5638	5638	5638	3.75113	3.75113	LC	5	5
男	57	25	85	104000	5.01703	0.748	-0.126098	4382	4382	4382	3.64167	3.64167	LC	5	5
男	37	82	64	26200	4.4183	482.2	2.68323	5118	5118	5118	3.7091	3.7091	LC	5	4
男	42	39	50	100	2	0.109	-0.962574	8146	8146	8146	3.91094	3.91094	LC	5	4
男	39	53	32	6200000	6.79239	84.73	1.92804	1537	1537	1537	3.18667	3.18667	IC	5	2
男	60	71	58	100	2	1.16	0.064458	3743	3743	3743	3.57322	3.57322	LC	5	2
男	24	23	33	1310	3.11727	1.23	0.0899051	10445	10445	10445	4.01891	4.01891	LC	5	1
男	53	63	58	1750	3.24304	0.17	-0.769551	3348	3348	3348	3.52479	3.52479	LC	5	4
男	43	34	63	34800	4.54158	7.11	0.85187	8285	8285	8285	3.91829	3.91829	LC	5	5
男	54	59	74	100	2	0.079	-1.10237	6721	6721	6721	3.82743	3.82743	LC	5	5
女	59	36	80	2780000	6.44404	0.137	-0.863279	7244	7244	7244	3.85998	3.85998	LC	5	5
女	59	36	51	822000	5.91487	0.108	-0.966576	6475	6475	6475	3.81124	3.81124	LC	5	5
男	53	32	28	3970000	6.59879	0.12	-0.920819	8290	8290	8290	3.91855	3.91855	LC	5	2
男	62	66	336	3230	3.5092	188.1	2.27439	6756	6756	6756	3.82969	3.82969	LC	5	5
男	43	39	57	162	2.20952	2.21	0.344392	7476	7476	7476	3.87367	3.87367	LC	5	5
男	38	92	200	82500000	7.91645	969.2	2.98641	1348	1348	1348	3.12969	3.12969	IC	5	5
男	36	93	70	100	2	649.9	2.81285	5726	5726	5726	3.75785	3.75785	LC	5	2

## Sheet: PLCP
gender	age	ALT	AST	HBV DNA	HBV DNA log10 IU/mL	HBeAg	HBeAg log10 IU/mL	HBsAg原始	HBsAg1	HBsAg	HBsAg log10 IU/mL	HBsAg log10 IU/mL1	Phases	Phases in the course of CHB	CMS of patients with CHB (1=SKD,2=LQD,3=IDHR,4=LKD,5=BSBC)
男	68	42	152	100	2	0.139	-0.856985	106	106	106	2.02531	2.02531	HCC	6	4
男	43	31	35	100	2	0.108	-0.966576	9608	9608	9608	3.98263	3.98263	HCC	6	1
男	59	24	30	891000	5.94988	0.116	-0.935542	8182	8182	8182	3.91286	3.91286	HCC	6	1
男	34	33	74	100	2	1.79	0.252853	8676	8676	8676	3.93832	3.93832	HCC	6	2
男	29	223	136	100	2	0.141	-0.850781	9192	9192	9192	3.96341	3.96341	HCC	6	1
女	32	25	176	10200	4.0086	0.116	-0.935542	6812	6812	6812	3.83327	3.83327	HCC	6	3
男	56	55	48	100	2	0.106	-0.974694	4386	4386	4386	3.64207	3.64207	HCC	6	3
女	55	27	321	100	2	1.52	0.181844	8474	8474	8474	3.92809	3.92809	HCC	6	4
男	72	65	54	29000	4.4624	0.113	-0.946922	3234	3234	3234	3.50974	3.50974	HCC	6	4
男	43	26	35	100	2	0.112	-0.950782	9126	9126	9126	3.96028	3.96028	HCC	6	3
女	45	71	65	5860	3.7679	0.111	-0.954677	10529	10529	10529	4.02239	4.02239	HCC	6	1
男	66	30	62	1110	3.04532	0.091	-1.04096	7472	7472	7472	3.87344	3.87344	HCC	6	5
男	54	100	120	108000	5.03342	0.104	-0.982967	378.6	378.6	378.6	2.57818	2.57818	HCC	6	5
男	45	28	36	100	2	5.22	0.717671	8773	8773	8773	3.94315	3.94315	HCC	6	3
男	52	46	112	99600	4.99826	298.9	2.47553	4417	4417	4417	3.64513	3.64513	HCC	6	2
男	55	97	299	645000	5.80956	0.331	-0.480172	8910	8910	8910	3.94988	3.94988	HCC	6	3
女	61	67	45	246000	5.39094	0.109	-0.962574	6849	6849	6849	3.83563	3.83563	HCC	6	3
男	61	57	48	5090	3.70672	0.147	-0.832683	6181	6181	6181	3.79106	3.79106	HCC	6	2
男	70	40	30	1720	3.23553	95.03	1.97786	6754	6754	6754	3.82956	3.82956	HCC	6	4
男	69	18	20	100	2	0.298	-0.525784	3779	3779	3779	3.57738	3.57738	HCC	6	5
男	44	78	116	507000	5.70501	0.067	-1.17393	7389	7389	7389	3.86859	3.86859	HCC	6	1
女	56	47	140	3720	3.57054	0.124	-0.906578	7936	7936	7936	3.8996	3.8996	HCC	6	1
男	57	39	34	28800	4.45939	6.32	0.800717	7327	7327	7327	3.86493	3.86493	HCC	6	2
男	44	168	344	40800	4.61066	0.379	-0.421361	8670	8670	8670	3.93802	3.93802	HCC	6	3
男	48	18	34	330	2.51851	0.112	-0.950782	6316	6316	6316	3.80044	3.80044	HCC	6	3
男	67	23	31	2610	3.41664	0.103	-0.987163	6014	6014	6014	3.77916	3.77916	HCC	6	4
男	54	41	65	968000	5.98588	0.126	-0.899629	4133	4133	4133	3.61627	3.61627	HCC	6	3
男	40	225	514	14800	4.17026	0.893	-0.0491485	8099	8099	8099	3.90843	3.90843	HCC	6	3
男	37	15	38	100	2	0.109	-0.962574	4163	4163	4163	3.61941	3.61941	HCC	6	4
男	45	27	31	1050	3.02119	0.446	-0.350665	2635	2635	2635	3.42078	3.42078	HCC	6	4
女	45	41	44	2800	3.44716	0.119	-0.924453	8392	8392	8392	3.92387	3.92387	HCC	6	3
男	68	118	225	735000	5.86629	0.109	-0.962574	7044	7044	7044	3.84782	3.84782	HCC	6	3
男	66	31	51	972	2.98767	0.122	-0.91364	6228	6228	6228	3.79435	3.79435	HCC	6	3
男	45	24	32	100	2	0.131	-0.882729	31.12	31.12	31.12	1.49304	1.49304	HCC	6	4
男	54	75	94	21100	4.32428	0.125	-0.90309	291.4	291.4	291.4	2.46449	2.46449	HCC	6	5
男	47	56	76	431000	5.63448	0.136	-0.866461	6767	6767	6767	3.8304	3.8304	HCC	6	5
男	73	21	27	100	2	0.113	-0.946922	6440	6440	6440	3.80889	3.80889	HCC	6	5
男	65	31	44	54300	4.7348	265.5	2.42406	952.1	952.1	952.1	2.97868	2.97868	HCC	6	4
男	61	103	64	243000	5.38561	0.115	-0.939302	7053	7053	7053	3.84837	3.84837	HCC	6	5
男	33	42	47	959	2.98182	0.355	-0.449772	4748	4748	4748	3.67651	3.67651	HCC	6	5
男	36	65	29	993	2.99695	0.798	-0.0979971	7629	7629	7629	3.88247	3.88247	HCC	6	5
女	45	17	27	100	2	0.11	-0.958607	8440	8440	8440	3.92634	3.92634	HCC	6	2
男	70	20	27	346000	5.53908	441.3	2.64473	5745	5745	5745	3.75929	3.75929	HCC	6	3
男	44	20	29	100	2	0.134	-0.872895	1078	1078	1078	3.03262	3.03262	HCC	6	5
男	67	20	27	2180	3.33846	0.094	-1.02687	4988	4988	4988	3.69793	3.69793	HCC	6	5

[truncated: 8 more sheets: IAS, AS, LSS, SKD, LQD, GLDH, LKD, BSBC]
